# Supplementary material for: Base-promoted [1,4]-Wittig rearrangement of chalcone-derived allylic ethers leading to aromatic β-benzyl ketones
Source: Royal Society of Chemistry journal article supplement (doi:10.1039/c5ra03846d), 2015-01-01
Supplement: c5ra03846d1.pdf [file c5ra03846d1.pdf]

# Supporting Information

## Base-promoted [1,4]-Wittig Rearrangement of Chalcone-derived

### Allylic Ethers Leading to Aromatic $\beta$ -Benzyl Ketones

Pei-Sen Gao<sup>a,b</sup>, Fei Ye<sup>b</sup>, Xiao-Yun Dong<sup>a</sup>, Yun Chen<sup>a</sup>, Zi-Wei Gao<sup>\*a</sup>, Wei-Qiang Zhang<sup>a</sup>, Li-Wen Xu<sup>\*a,b</sup>

<sup>a</sup> Key Laboratory of Applied Surface and Colloid Chemistry, Ministry of Education (MOE) and School of Chemistry and Chemical Engineering, Shaanxi Normal University, Xi'an 710062, P. R. China. Fax: (+86)-571-28867756; E-mail: [licpxulw@yahoo.com](mailto:licpxulw@yahoo.com)

<sup>b</sup> Key Laboratory of Organosilicon Chemistry and Material Technology of Ministry of Education, Hangzhou Normal University, Hangzhou 310012, P. R. China. Fax: 86 2886 5135; Tel: 86 2886 5135; E-mail: [liwenxu@hznu.edu.cn](mailto:liwenxu@hznu.edu.cn)

## Table of Contents

|                                                                                                                               |         |
|-------------------------------------------------------------------------------------------------------------------------------|---------|
| 1 General Information .....                                                                                                   | S1      |
| 2 General Procedure for Synthesis of $\alpha,\beta$ -Unsaturated Ketones.....                                                 | S1      |
| 3 General Procedure for Synthesis of allylic alcohols.....                                                                    | S3-S4   |
| 4 General Procedure for Synthesis of (E)-1, 3-diphenylallyl acetate.....                                                      | S4      |
| 5 General procedure for the Pd-catalyzed allylic etherification of (E)- 1,3-di-phenylallylic acetate with benzyl alcohol..... | S4-S5   |
| 6 Typical Procedure for synthesis of 1,3,4-triphenylbutan-1-one.....                                                          | S6      |
| 7 Character of the representative substrates 1 and products 2.....                                                            | S6-S10  |
| Figure S1. No reaction when the addition of TEMPO to lithium-promoted [1,4]-Wittig rearrangement.....                         | S11     |
| 8 <sup>1</sup> H/ <sup>13</sup> C-NMR of the products 2 and representative substrates.....                                    | S12-S25 |
| 9 HR-MS of Representative products: 2b and 2c.....                                                                            | S26     |
| 10 HPLC Charts of enantioselective [1,4]-Wittig rearrangement.....                                                            | S27     |

## 1. General Information

Reagents were purchased from commercial sources and were used as received unless mentioned otherwise. Reactions were monitored by thin layer chromatography using silica gel.  $^1\text{H}$ NMR and  $^{13}\text{C}$ NMR (400 and 100MHz, respectively) spectra were recorded in  $\text{CDCl}_3$ ,  $^1\text{H}$  NMR chemical shifts are reported in ppm relative to tetramethylsilane (TMS) with the solvent resonance employed as the internal standard ( $\text{CDCl}_3$  at 7.26 ppm).  $^{13}\text{C}$ NMR chemical shifts are reported in ppm from tetramethylsilane (TMS) with the solvent resonance as the internal standard).

## 2. General Procedure for Synthesis of $\alpha,\beta$ -Unsaturated Ketones

To a solution of NaOH (2.2 g, 55 mmol, 1.3 equiv) in  $\text{H}_2\text{O}$  (20 mL) and phenyl ketone (43 mmol, 1.0 equiv) in 12 mL ethanol at 0  $^\circ\text{C}$  was added gradually phenyl aldehyde (43 mmol, 1.0 equiv). The mixture was then allowed to warm to room temperature and stirred for 4h after which a precipitate of the product formed. The product was collected by suction filtration on a Buchner funnel and washed repeatedly with cold water. Recrystallization from ethanol afforded  $\alpha,\beta$ -unsaturated ketones S-1a and S-1b.

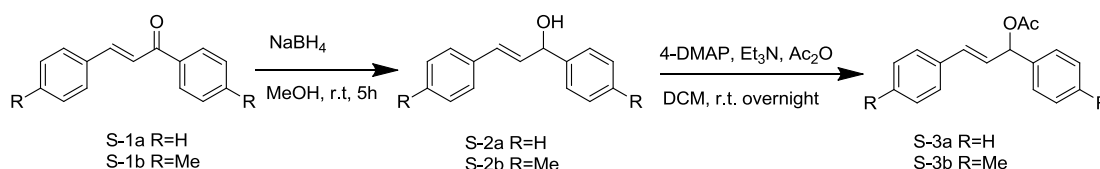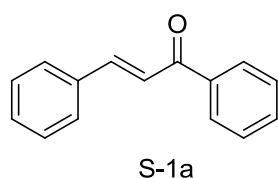

(E)-chalcone:  $^1\text{H}$  NMR (400 MHz,  $\text{CDCl}_3$ )  $\delta$  8.04 (d,  $J = 7.5$  Hz, 2H), 7.83 (d,  $J = 15.7$  Hz, 1H), 7.64 (d,  $J = 4.6$  Hz, 2H), 7.60-7.47 (m, 4H), 7.41 (s, 3H).  $^{13}\text{C}$  NMR (100 MHz,  $\text{CDCl}_3$ )  $\delta$  188.27, 142.60, 136.02, 132.69, 130.60, 128.36, 126.78, 126.44, 126.32, 126.27, 119.89.

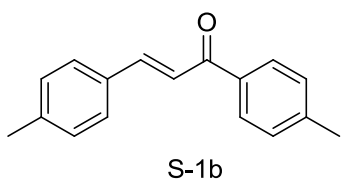

(E)-1,3-di-p-tolylprop-2-en-1-one:  $^1\text{H}$  NMR (400 MHz,  $\text{CDCl}_3$ )  $\delta$  7.93 (d,  $J$  = 7.6 Hz, 2H), 7.78 (d,  $J$  = 15.6 Hz, 1H), 7.59-7.43 (m, 5H), 7.28 (d,  $J$  = 7.6 Hz, 1H), 7.20 (d,  $J$  = 7.6 Hz, 1H), 2.41 (s, 3H), 2.37 (s, 3H).  $^{13}\text{C}$  NMR (100 MHz,  $\text{CDCl}_3$ )  $\delta$  190.07, 144.48, 143.50, 140.94, 135.80, 132.30, 129.71, 129.32, 128.65, 128.47, 121.10, 21.68, 21.54.

### 3. General Procedure for Synthesis of allylic alcohols

To a cooled solution (0  $^\circ\text{C}$ ) of  $\alpha,\beta$ -Unsaturated Ketones 1a (9.5 g, 45.9mmol)/ 1b (10.9g, 45.9mmol) in methanol, sodium borohydride (3.5g, 91.4mmol, 2equiv.) was added portion wise at 0  $^\circ\text{C}$ , and stirred for about 6 h hour until 1a/1b was completely consumed. The reaction was quenched with  $\text{H}_2\text{O}$ , and extracted with DCM. The combined extracts were washed with brine, and dried over  $\text{Na}_2\text{SO}_4$ . The solvent was removed in vacuo. S-1a. White solid, Yield: 94%. S-2a. White solid, Yield: 91%.

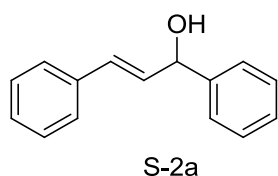

$^1\text{H}$  NMR (400 MHz,  $\text{CDCl}_3$ )  $\delta$  7.33 (d,  $J$  = 7.3 Hz, 2H), 7.28 (d,  $J$  = 7.4 Hz, 4H), 7.25 (d,  $J$  = 4.5 Hz, 1H), 7.21 (dd,  $J$  = 9.3, 5.6 Hz, 3H), 7.15 (d,  $J$  = 7.4 Hz, 1H), 6.58 (d,  $J$  = 15.8 Hz, 1H), 6.28 (dd,  $J$  = 15.8, 6.5 Hz, 1H), 5.27 (d,  $J$  = 6.4 Hz, 1H), 2.16 (s, 1H).  $^{13}\text{C}$  NMR (100 MHz,  $\text{CDCl}_3$ )  $\delta$  142.85, 136.59, 131.61, 130.58, 128.66, 128.61, 127.82, 126.67, 75.29.

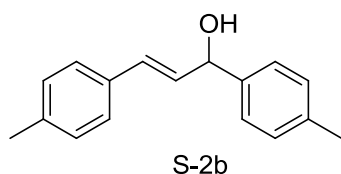

$^1\text{H}$  NMR (400 MHz,  $\text{CDCl}_3$ )  $\delta$  7.23 (d,  $J$  = 7.5 Hz, 2H), 7.19 (d,  $J$  = 7.6 Hz, 2H), 7.09 (d,  $J$  = 7.7 Hz, 2H), 7.04 (d,  $J$  = 7.8 Hz, 2H), 6.51 (d,  $J$  = 15.8 Hz, 1H), 6.23 (dd,  $J$  = 15.8, 6.5 Hz, 1H), 5.19 (s, 1H), 2.93 (s, 1H), 2.29 (s, 3H),

2.27 (s, 3H).  $^{13}\text{C}$  NMR (100 MHz,  $\text{CDCl}_3$ )  $\delta$  140.29, 137.56, 137.35, 134.08, 131.01, 130.31, 129.39, 126.71, 126.54, 75.01, 21.35, 21.29.

#### 4. General Procedure for Synthesis of (E)-1, 3-diphenylallyl acetate

DMAP (5.8 mg, 0.048 mmol) was added to a 3 mL DCM solution of 1a (100 mg, 0.48 mmol),  $\text{Et}_3\text{N}$  (1 mL, 1.2 mmol), and acetic anhydride (1 mL, 1.2 mmol). The reaction mixture was stirred at room temperature until B had disappeared as monitored by TLC. Ethyl acetate (30 mL) was added and the mixture was washed with water (3  $\times$  30 mL). The organic layer was dried over  $\text{MgSO}_4$ , filtered, concentrated, and purified by column chromatography on silica gel with ethyl acetate and petroleum (v/v = 1:5) as eluent to give S-3a as colourless oil (110 mg, 91%).

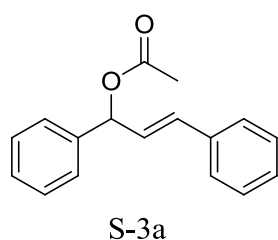

$^1\text{H}$  NMR (400 MHz,  $\text{CDCl}_3$ )  $\delta$  7.34 (d,  $J$  = 7.8 Hz, 2H), 7.31 (d,  $J$  = 7.1 Hz, 4H), 7.24 (dd,  $J$  = 13.3, 6.9 Hz, 3H), 7.17 (d,  $J$  = 4.4 Hz, 1H), 6.56 (d,  $J$  = 15.7 Hz, 1H), 6.37 (d,  $J$  = 6.9 Hz, 1H), 6.28 (dd,  $J$  = 15.7, 6.8 Hz, 1H), 2.07 (s, 3H).  $^{13}\text{C}$  NMR (100 MHz,  $\text{CDCl}_3$ )  $\delta$  170.07, 139.24, 136.17, 132.60, 128.65, 128.59, 128.20, 128.08, 127.50, 127.06, 126.71, 76.16, 21.18.

#### 5. General procedure for the Pd-catalyzed allylic etherification of (E)-1,3-di-phenylallyl acetate 3 with benzyl alcohol

A solution of  $[(\text{C}_3\text{H}_5)\text{PdCl}]_2$  (0.0019 g, 0.005 mmol) and phosphine ligand (0.01 mmol) was stirred for 30 min. (E)-1,3-diphenylallyl acetate (0.05 mL, 0.25 mmol) was added and the solution stirred for 15 min, then benzyl alcohol (0.08 mL, 0.75 mmol) and anhydrous  $\text{Cs}_2\text{CO}_3$  (0.245 g, 0.75 mmol) were added and the reaction mixture stirred overnight. The resulting solution was quenched with EtOAc (1.5 mL) and saturated aqueous  $\text{NH}_4\text{Cl}$  solution (3 mL). The mixture was then extracted with EtOAc (2  $\times$  2 mL), dried over anhydrous  $\text{Na}_2\text{SO}_4$ , evaporated at reduced pressure, the

residue was purified by flash chromatography on a short pad of silica gel (10 cm, EtOAc/ Petroleum ether 1/10) and dried in vacuum for 2 h gave the desired product 3a as colorless oil. Yield: 78%.

**Table S1.** Optimization for Pd-catalyzed allylic etherification of (E)-1,3-di-phenylallyl acetate (3) with benzyl alcohol

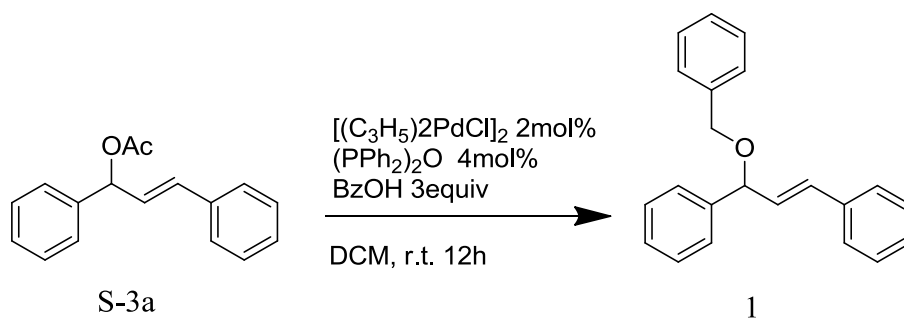

| Entry | Catalyst                                            | Ligand                             | Base                            | Solvent | Yield <sup>iso</sup> (%) |
|-------|-----------------------------------------------------|------------------------------------|---------------------------------|---------|--------------------------|
| 1     | Pd(OAc) <sub>2</sub>                                | PPh <sub>3</sub>                   | K <sub>2</sub> CO <sub>3</sub>  | DCM     | 51                       |
| 2     | [(C <sub>3</sub> H <sub>5</sub> )PdCl] <sub>2</sub> | PPh <sub>3</sub>                   | K <sub>2</sub> CO <sub>3</sub>  | DCM     | 62                       |
| 3     | Pd(PPh <sub>3</sub> ) <sub>2</sub> Cl <sub>2</sub>  | PPh <sub>3</sub>                   | K <sub>2</sub> CO <sub>3</sub>  | DCM     | 51                       |
| 4     | [(C <sub>3</sub> H <sub>5</sub> )PdCl] <sub>2</sub> | (PPh <sub>2</sub> ) <sub>2</sub> O | K <sub>2</sub> CO <sub>3</sub>  | DCM     | 53                       |
| 5     | [(C <sub>3</sub> H <sub>5</sub> )PdCl] <sub>2</sub> | (PPh <sub>3</sub> ) <sub>2</sub> O | Cs <sub>2</sub> CO <sub>3</sub> | DCM     | 78                       |
| 6     | [(C <sub>3</sub> H <sub>5</sub> )PdCl] <sub>2</sub> | (PPh <sub>2</sub> ) <sub>2</sub> O | Et <sub>3</sub> N               | DCM     | 55                       |
| 7     | [(C <sub>3</sub> H <sub>5</sub> )PdCl] <sub>2</sub> | DPPE                               | Cs <sub>2</sub> CO <sub>3</sub> | DCM     | 68                       |
| 8     | [(C <sub>3</sub> H <sub>5</sub> )PdCl] <sub>2</sub> | BINAP                              | Cs <sub>2</sub> CO <sub>3</sub> | DCM     | 61                       |
| 9     | [(C <sub>3</sub> H <sub>5</sub> )PdCl] <sub>2</sub> | P <sup>t</sup> Bu <sub>3</sub>     | Cs <sub>2</sub> CO <sub>3</sub> | DCM     | 33                       |
| 10    | [(C <sub>3</sub> H <sub>5</sub> )PdCl] <sub>2</sub> | (PPh <sub>2</sub> ) <sub>2</sub> O | Cs <sub>2</sub> CO <sub>3</sub> | THF     | 70                       |
| 11    | [(C <sub>3</sub> H <sub>5</sub> )PdCl] <sub>2</sub> | (PPh <sub>2</sub> ) <sub>2</sub> O | Cs <sub>2</sub> CO <sub>3</sub> | MeCN    | 62                       |
| 12    | [(C <sub>3</sub> H <sub>5</sub> )PdCl] <sub>2</sub> | (PPh <sub>2</sub> ) <sub>2</sub> O | Cs <sub>2</sub> CO <sub>3</sub> | Toluene | 55                       |

## 6. Typical Procedure for synthesis of 1,3,4-triphenylbutan-1-one (2a)

To a solution of allylic ether **1a** (0.5 mmol,) in 4 mL of THF, 0.24 mL (0.6 mmol) of a solution of *n*-BuLi in hexane was dropwise added at -78 °C. The resulting solution was further stirred at -40 °C. After completion of the reaction, the resulting solution was quenched with a piece of ice and saturated aqueous NH<sub>4</sub>Cl solution (10mL). The mixture was then extracted with DCM (3 x 8 mL), dried over anhydrous Na<sub>2</sub>SO<sub>4</sub>, evaporated at reduced pressure and the desired compound 1,3,4-triphenylbutan-1-one **2a** was obtained in 80% yield (0.135g) after column purification using PE/EA (20:1) as solvent.

## 7. Charcter of the representative substrates 1 and product 2

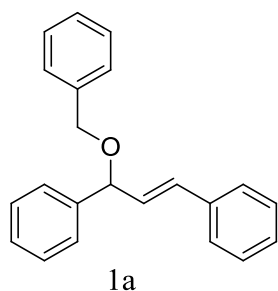

<sup>1</sup>H NMR (400 MHz, CDCl<sub>3</sub>) δ 7.35 (d, J = 7.7 Hz, 2H), 7.31 (s, 2H), 7.26 (d, J = 8.1 Hz, 2H), 7.23 (s, 2H), 7.19 (s, 2H), 7.14 (d, J = 7.2 Hz, 1H), 6.54 (d, J = 15.9 Hz, 1H), 6.26 (dd, J = 15.9, 7.0 Hz, 1H), 4.93 (d, J = 7.0 Hz, 1H), 4.49 (s, 2H). <sup>13</sup>C NMR (100 MHz, CDCl<sub>3</sub>) δ 141.19, 138.47, 136.63, 131.61, 130.32, 128.60, 128.45, 127.78, 127.60, 127.04, 126.67, 81.65,

70.16.

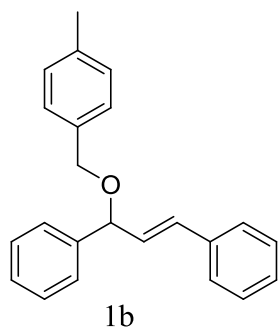

<sup>1</sup>H NMR (400 MHz, CDCl<sub>3</sub>) δ 7.42 (d, J = 7.7 Hz, 1H), 7.36 (t, J = 7.6 Hz, 1H), 7.32-7.26 (m, 1H), 7.25-7.18 (m, 1H), 7.15 (d, J = 7.6 Hz, 1H), 6.61 (d, J = 15.9 Hz, 1H), 6.32 (dd, J = 15.9, 6.9 Hz, 1H), 4.99 (d, J = 7.0 Hz, 1H), 4.53 (s, 2H), 2.34 (s, 3H). <sup>13</sup>C NMR (100MHz, CDCl<sub>3</sub>) δ 141.31, 137.28, 136.71, 135.43, 131.53, 130.47, 129.15, 128.59, 127.93, 127.74,

127.08, 126.68, 81.42, 70.04, 21.26.

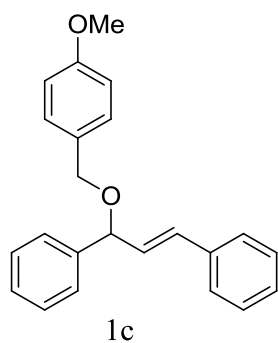

$^1\text{H}$  NMR (400 MHz,  $\text{CDCl}_3$ )  $\delta$  7.41 (d,  $J$  = 7.7 Hz, 2H), 7.33 (t,  $J$  = 7.0 Hz, 4H), 7.25 (dd,  $J$  = 14.2, 7.5 Hz, 5H), 7.17 (t,  $J$  = 7.2 Hz, 1H), 6.86 (d,  $J$  = 7.9 Hz, 2H), 6.59 (d,  $J$  = 15.9 Hz, 1H), 6.31 (dd,  $J$  = 15.9, 6.9 Hz, 1H), 4.97 (d,  $J$  = 6.9 Hz, 1H), 4.48 (s, 2H), 3.72 (s, 3H).  $^{13}\text{C}$  NMR (100 MHz,  $\text{CDCl}_3$ )  $\delta$  159.34, 141.43, 136.79, 131.58, 130.64, 130.60, 129.49, 128.68, 127.86, 127.83, 127.17, 126.76, 113.97, 81.43, 69.94, 55.34.

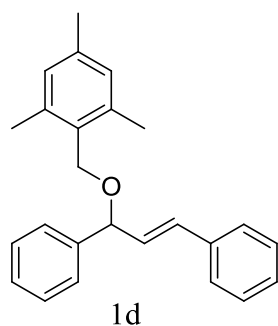

$^1\text{H}$  NMR (400 MHz,  $\text{CDCl}_3$ )  $\delta$  7.67 (d,  $J$  = 7.5 Hz, 2H), 7.58 (t,  $J$  = 7.1 Hz, 4H), 7.49 (t,  $J$  = 7.6 Hz, 3H), 7.42 (d,  $J$  = 7.0 Hz, 1H), 7.08 (s, 2H), 6.86 (d,  $J$  = 15.9 Hz, 1H), 6.59 (dd,  $J$  = 15.9, 6.6 Hz, 1H), 5.22 (d,  $J$  = 6.7 Hz, 1H), 4.75 (dd,  $J$  = 25.3, 10.3 Hz, 2H), 2.55 (s, 6H), 2.48 (s, 3H).  $^{13}\text{C}$  NMR (100 MHz,  $\text{CDCl}_3$ )  $\delta$  141.65, 138.16, 137.74, 136.93, 131.62, 131.39, 130.88, 129.18, 128.75, 128.69, 127.86, 127.27, 126.79, 82.40, 65.19, 21.24, 19.82.

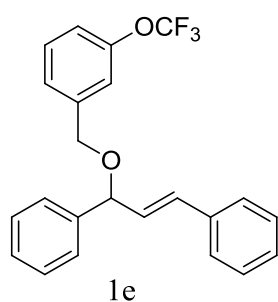

$^1\text{H}$  NMR (400 MHz,  $\text{CDCl}_3$ )  $\delta$  7.42 (d,  $J$  = 7.5 Hz, 2H), 7.37 (d,  $J$  = 7.2 Hz, 4H), 7.33 (s, 1H), 7.28 (t,  $J$  = 8.0 Hz, 5H), 7.20 (dd,  $J$  = 15.7, 8.2 Hz, 1H), 7.11 (d,  $J$  = 7.8 Hz, 1H), 6.63 (d,  $J$  = 15.9 Hz, 1H), 6.33 (dd,  $J$  = 15.9, 7.0 Hz, 1H), 4.99 (d,  $J$  = 7.0 Hz, 1H), 4.60-4.49 (m, 2H).  $^{13}\text{C}$  NMR (100 MHz,  $\text{CDCl}_3$ )  $\delta$  149.49, 141.07, 140.89, 136.52, 131.92, 129.98, 129.82, 128.72, 128.66, 127.98, 127.95, 127.03, 126.72, 125.80, 82.18, 69.36.

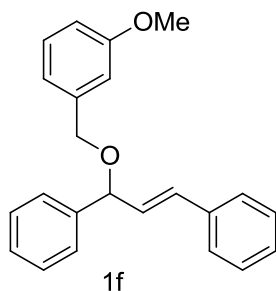

$^1\text{H}$  NMR (400 MHz,  $\text{CDCl}_3$ )  $\delta$  7.50 (d,  $J$  = 7.4 Hz, 2H), 7.44 (d,  $J$  = 7.6 Hz, 2H), 7.33 (t,  $J$  = 7.6 Hz, 1H), 7.24 (t,  $J$  = 7.9 Hz, 1H), 7.17 (d,  $J$  = 7.4 Hz, 2H), 6.95 (t,  $J$  = 7.4 Hz, 1H), 6.79 (d,  $J$  = 8.2 Hz, 1H), 6.63 (d,  $J$  = 15.9 Hz, 2H), 6.34 (dd,  $J$  = 15.9, 6.9 Hz, 2H), 5.03 (d,  $J$  = 6.9 Hz, 1H), 4.62 (q,  $J$  = 12.8 Hz, 1H), 3.71 (s, 3H).  $^{13}\text{C}$  NMR (100 MHz,  $\text{CDCl}_3$ )  $\delta$  157.16, 141.64, 136.90, 131.48, 130.80, 128.81, 128.68, 128.63, 128.60, 127.82, 127.76, 127.15, 126.79, 120.62, 110.28, 82.25, 65.50, 55.36.

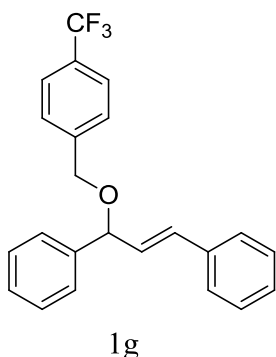

$^1\text{H}$  NMR (400 MHz,  $\text{CDCl}_3$ )  $\delta$  7.59 (d,  $J$  = 7.8 Hz, 2H), 7.47 (d,  $J$  = 7.9 Hz, 2H), 7.43 (d,  $J$  = 7.5 Hz, 2H), 7.37 (d,  $J$  = 3.2 Hz, 4H), 7.29 (t,  $J$  = 6.7 Hz, 3H), 7.23 (d,  $J$  = 7.5 Hz, 1H), 6.64 (d,  $J$  = 15.9 Hz, 1H), 6.33 (dd,  $J$  = 15.9, 7.0 Hz, 1H), 5.00 (d,  $J$  = 7.0 Hz, 1H), 4.65-4.53 (m, 2H).  $^{13}\text{C}$  NMR (100 MHz,  $\text{CDCl}_3$ )  $\delta$  142.69, 140.85, 136.47, 131.91, 129.94, 128.71, 128.65, 127.98, 127.66, 126.98, 126.70, 125.41, 82.25, 69.41.

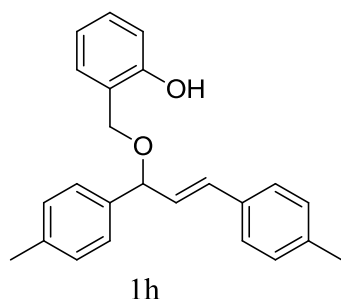

$^1\text{H}$  NMR (400 MHz,  $\text{CDCl}_3$ )  $\delta$  7.84 (d,  $J$  = 7.9 Hz, 2H), 7.70 (d,  $J$  = 7.9 Hz, 2H), 7.61 (d,  $J$  = 7.6 Hz, 2H), 7.54 (d,  $J$  = 7.5 Hz, 2H), 7.45 (d,  $J$  = 7.6 Hz, 2H), 7.35 (d,  $J$  = 7.6 Hz, 2H), 6.88 (d,  $J$  = 15.9 Hz, 1H), 6.58 (dd,  $J$  = 15.8, 7.0 Hz, 1H), 5.22 (d,  $J$  = 7.0 Hz, 1H), 4.92-4.74 (m, 2H), 2.82-2.41 (m, 7H).  $^{13}\text{C}$  NMR (100 MHz,  $\text{CDCl}_3$ )  $\delta$  143.14, 138.26, 137.89, 137.77, 134.01, 131.82, 129.56, 129.53, 129.33, 127.79, 127.17, 126.82, 125.46, 82.43, 69.42, 21.33.

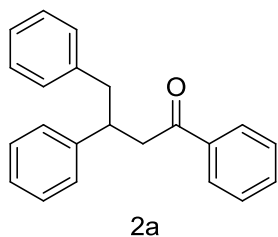

1,3,4-triphenylbutan-1-one (2a): white solid, 135.1mg, 80% yield.  $^1\text{H}$  NMR (400 MHz,  $\text{CDCl}_3$ )  $\delta$  7.76 (d,  $J$  = 7.6 Hz, 1H), 7.43 (t,  $J$  = 7.3 Hz, 1H), 7.32 (t,  $J$  = 7.5 Hz, 1H), 7.18-7.05 (m, 4H), 6.99 (d,  $J$  = 7.2 Hz, 1H), 3.59 (p,  $J$  = 7.0 Hz, 1H), 3.23 (qd,  $J$  = 16.8, 6.9 Hz, 2H), 2.97- 2.83 (m, 2H).  $^{13}\text{C}$  NMR (100 MHz,  $\text{CDCl}_3$ )  $\delta$  198.90, 144.14, 139.84, 137.22, 132.94, 129.30, 128.53, 128.38, 128.20, 128.02, 127.69, 126.42, 126.12, 44.17, 43.05, 43.01.

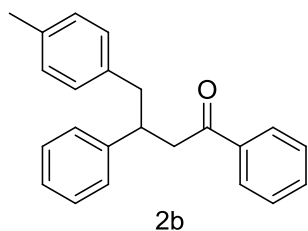

1,3-diphenyl-4-(p-tolyl)butan-1-one (2b): white solid. 119.2mg, 76% yield.  $^1\text{H}$  NMR (400 MHz,  $\text{CDCl}_3$ )  $\delta$  7.90 (d,  $J$  = 7.9 Hz, 2H), 7.57 (t,  $J$  = 7.3 Hz, 1H), 7.45 (t,  $J$  = 7.5 Hz, 2H), 7.29 (d,  $J$  = 7.2 Hz, 2H), 7.25 (d,  $J$  = 7.7 Hz, 3H), 7.08 (d,  $J$  = 7.8 Hz, 2H), 7.03 (d,  $J$  = 7.6 Hz, 2H), 3.75-3.68 (m, 1H), 3.43-3.28 (m, 2H), 3.00 (d,  $J$  = 7.4 Hz, 2H), 2.34 (s, 3H).  $^{13}\text{C}$  NMR (100 MHz,  $\text{CDCl}_3$ )  $\delta$  198.98, 144.31, 137.25, 136.71, 135.55, 132.90, 129.18, 128.92, 128.51, 128.37, 128.02, 127.70, 126.38, 44.14, 43.08, 42.58, 21.04. HR-MS calcd for  $\text{C}_{23}\text{H}_{23}\text{ONa}$   $[\text{M}+\text{Na}]^+$ , 337.1568, Found 337.1563.

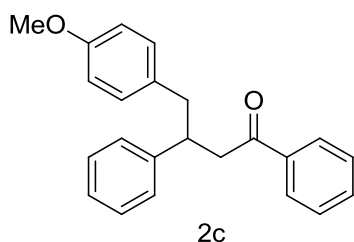

4-(4-methoxyphenyl)-1,3-diphenylbutan-1-one (2c): white solid. 63% yield. 104.1mg.  $^1\text{H}$  NMR (400 MHz,  $\text{CDCl}_3$ )  $\delta$  7.84 (d,  $J$  = 7.9 Hz, 1H), 7.51 (t,  $J$  = 7.3 Hz, 0H), 7.40 (t,  $J$  = 7.4 Hz, 1H), 7.24 (t,  $J$  = 7.4 Hz, 1H), 7.15 (dd,  $J$  = 11.5, 7.5 Hz, 1H), 6.97 (d,  $J$  = 7.7 Hz, 1H), 6.74 (d,  $J$  = 7.5 Hz, 1H), 3.74 (s, 3H), 3.62 (p,  $J$  = 7.2 Hz, 1H), 3.35-3.21 (m, 2H), 2.99-2.84 (m, 2H).  $^{13}\text{C}$  NMR (100MHz,  $\text{CDCl}_3$ )  $\delta$  198.99, 157.97, 144.24, 137.24, 132.91, 131.88, 130.22, 128.52, 128.36, 128.01, 127.71, 126.37, 113.60, 55.19, 44.09, 43.95, 42.11. HR-MS calcd for  $\text{C}_{23}\text{H}_{22}\text{O}_2\text{Na}$   $[\text{M}+\text{Na}]^+$ , 353.1517, Found 353.1500.

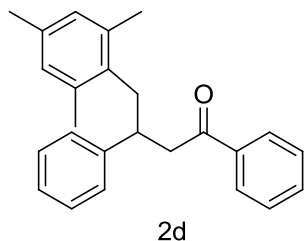

4-mesityl-1,3-diphenylbutan-1-one (2d) : white solid, 111.2mg, 65% yield.  $^1\text{H}$  NMR (400 MHz,  $\text{CDCl}_3$ )  $\delta$  7.95 (d,  $J = 7.7$  Hz, 2H), 7.61 (t,  $J = 7.1$  Hz, 4H), 7.50 (t,  $J = 7.4$  Hz, 3H), 7.40-7.34 (m, 1H), 7.31 (d,  $J = 7.4$  Hz, 1H), 6.92 (s, 1H), 3.82-3.71 (m, 1H), 3.61 (dd,  $J = 16.1, 8.3$  Hz, 1H), 3.41 (dd,  $J = 16.1, 5.5$  Hz, 1H), 3.17 (dd,  $J = 13.6, 7.9$  Hz, 1H), 2.99 (dd,  $J = 13.7, 7.3$  Hz, 1H), 2.36 (s, 6H), 2.32 (s, 3H).  $^{13}\text{C}$  NMR (100MHz,  $\text{CDCl}_3$ )  $\delta$  196.70, 142.33, 134.93, 134.62, 133.13, 131.35, 130.65, 126.88, 126.28, 126.13, 125.79, 125.32, 124.22, 41.20, 39.22, 34.75, 18.62, 18.02.

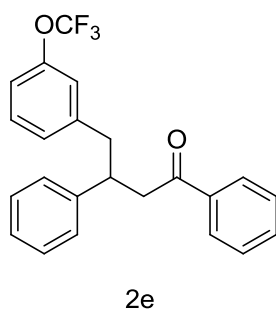

1,3-diphenyl-4-(3-(trifluoromethoxy)phenyl)butan-1-one (2e) : yellow oil. 117.2mg. 62% yield.  $^1\text{H}$  NMR (400 MHz,  $\text{CDCl}_3$ )  $\delta$  7.84 (d,  $J = 7.7$  Hz, 2H), 7.45 (t,  $J = 7.3$  Hz, 1H), 7.34 (t,  $J = 7.4$  Hz, 2H), 7.19 (t,  $J = 7.3$  Hz, 1H), 7.12 (dd,  $J = 13.3, 7.2$  Hz, 2H), 6.95 (d,  $J = 7.7$  Hz, 1H), 6.85 (s, 0H), 3.70-3.59 (m, 1H), 3.38-3.21 (m, 1H), 3.05 (dd,  $J = 13.4, 6.0$  Hz, 1H), 2.87 (dd,  $J = 13.2, 8.8$  Hz, 1H).  $^{13}\text{C}$  NMR (100MHz,  $\text{CDCl}_3$ )  $\delta$  198.57, 149.14, 143.49, 142.35, 137.18, 133.13, 129.48, 128.65, 128.54, 128.05, 127.82, 127.73, 126.71, 44.24, 42.96, 42.61.

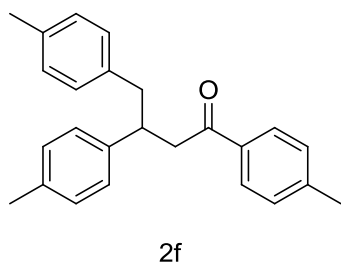

1,3,4-tri-p-tolylbutan-1-one: white solid. 116.4mg, 68% yield.  $^1\text{H}$  NMR (400 MHz,  $\text{CDCl}_3$ )  $\delta$  7.65 (d,  $J = 7.5$  Hz, 1H), 7.10 (d,  $J = 7.8$  Hz, 1H), 7.03- 6.95 (m, 1H), 6.94-6.86 (m, 1H), 3.52 (p,  $J = 7.1$  Hz, 0H), 3.15 (t,  $J = 6.1$  Hz, 1H), 2.83 (d,  $J = 7.4$  Hz, 1H), 2.28 (s, 3H), 2.19 (s, 6H).  $^{13}\text{C}$  NMR (100 MHz,  $\text{CDCl}_3$ )  $\delta$  198.73, 143.60, 141.23, 136.92, 135.72, 135.45, 134.82, 129.18, 129.06, 128.89, 128.19, 127.53, 44.16, 42.72, 42.62, 21.62, 21.05.

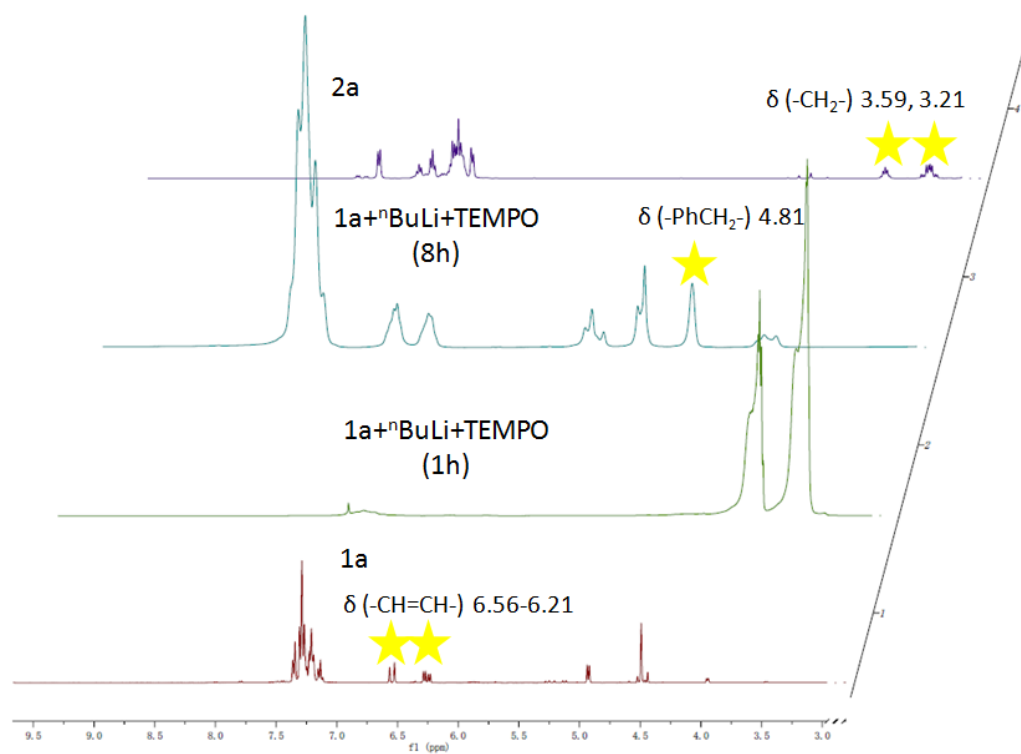

**Figure S1.** No reaction when the addition of TEMPO to lithium-promoted [1,4]-Wittig rearrangement

## 8. $^1\text{H}/^{13}\text{C}$ -NMR of the products **2** and representative substrates

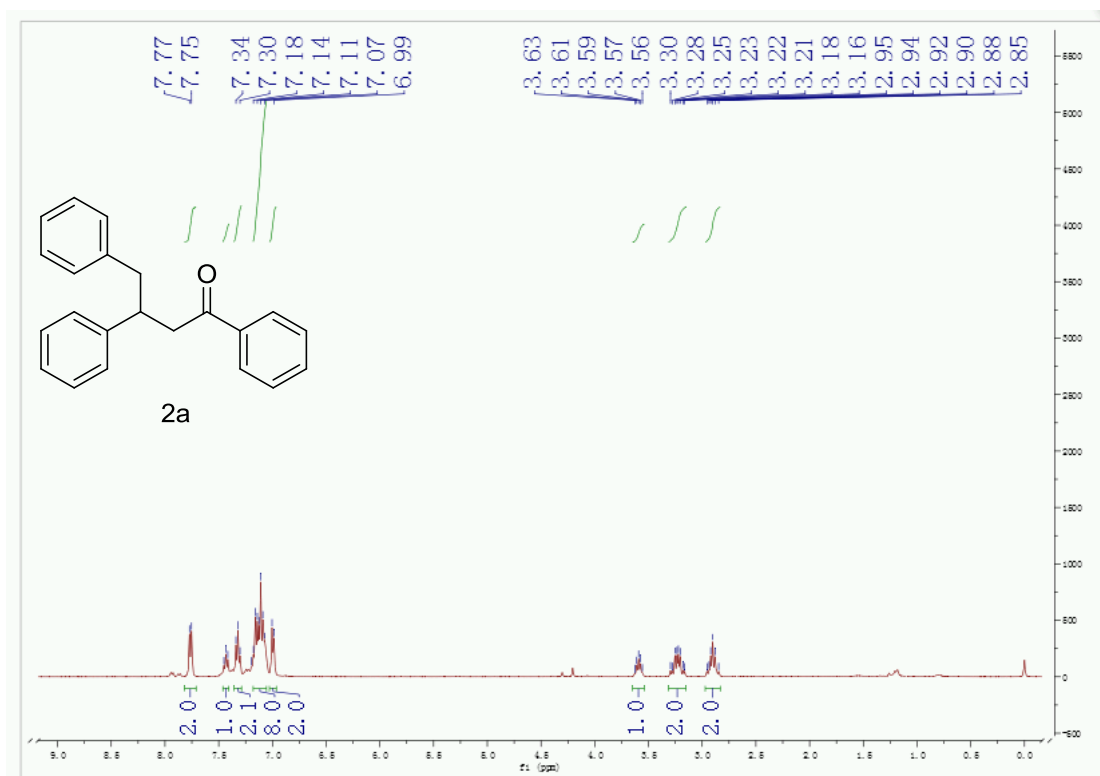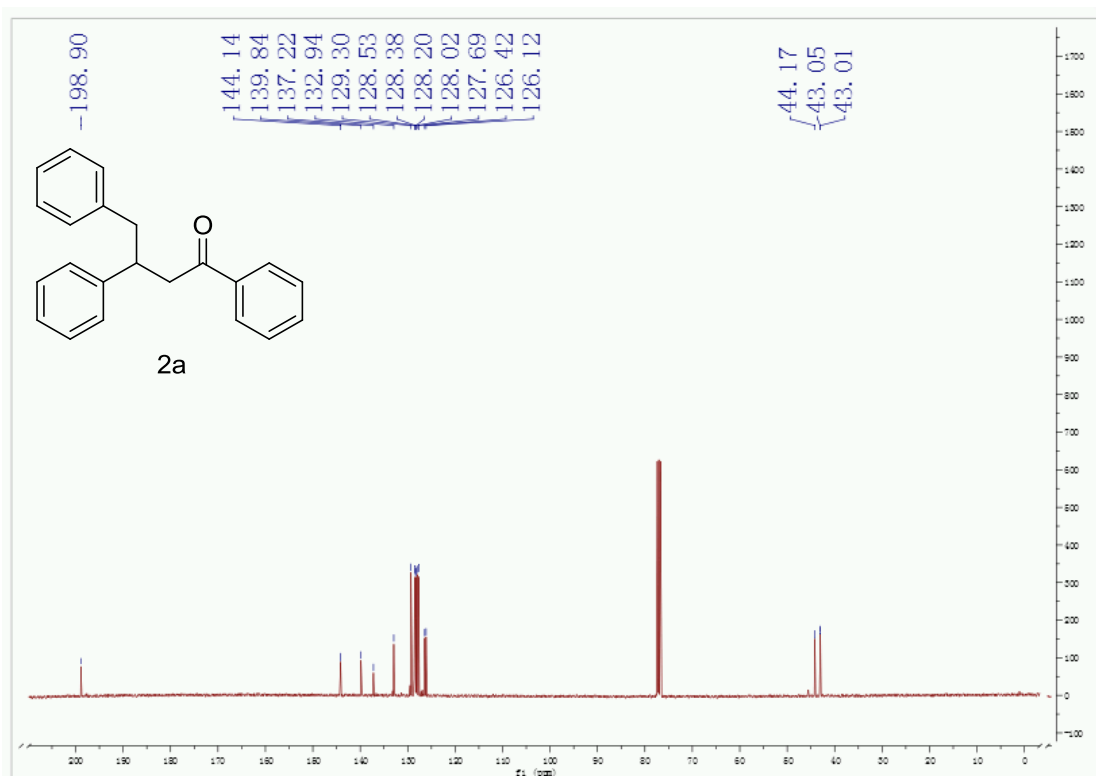

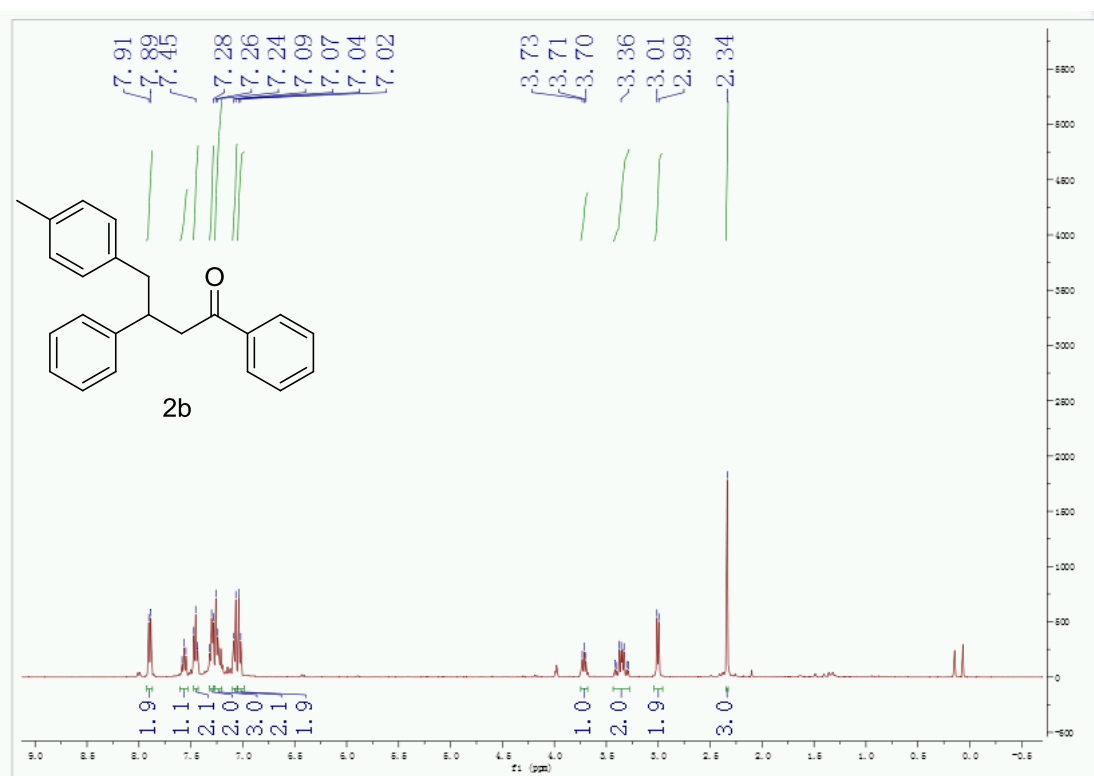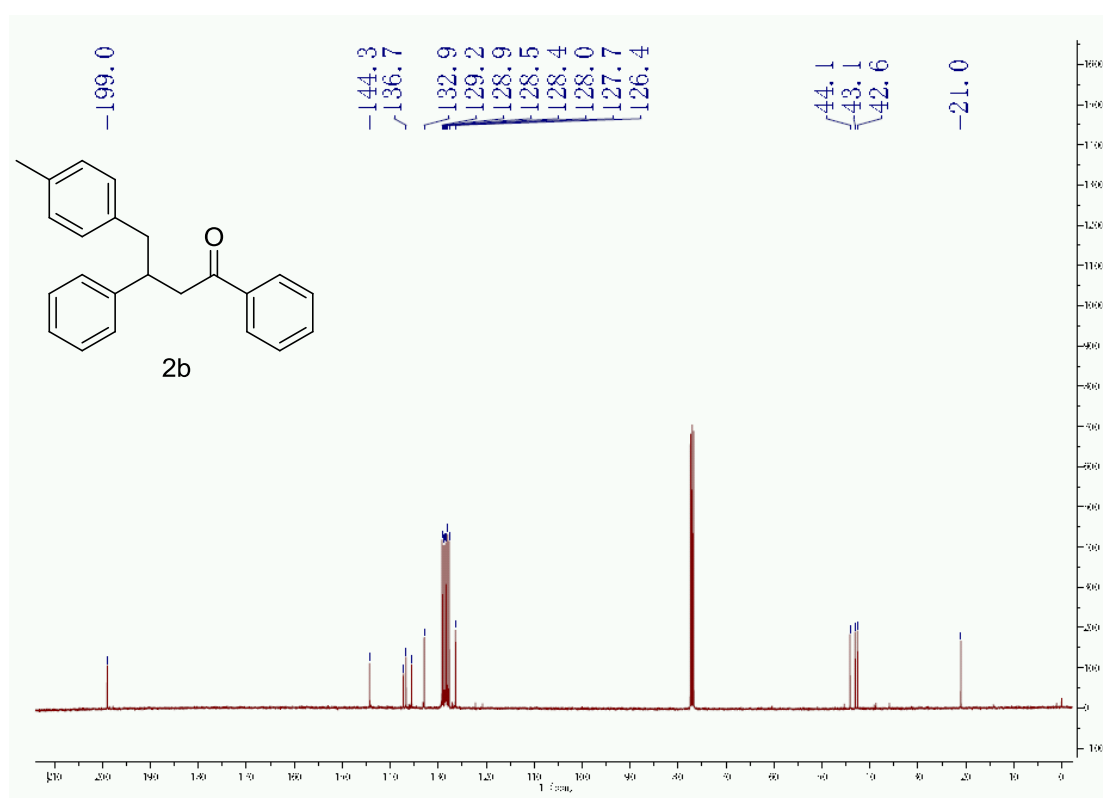

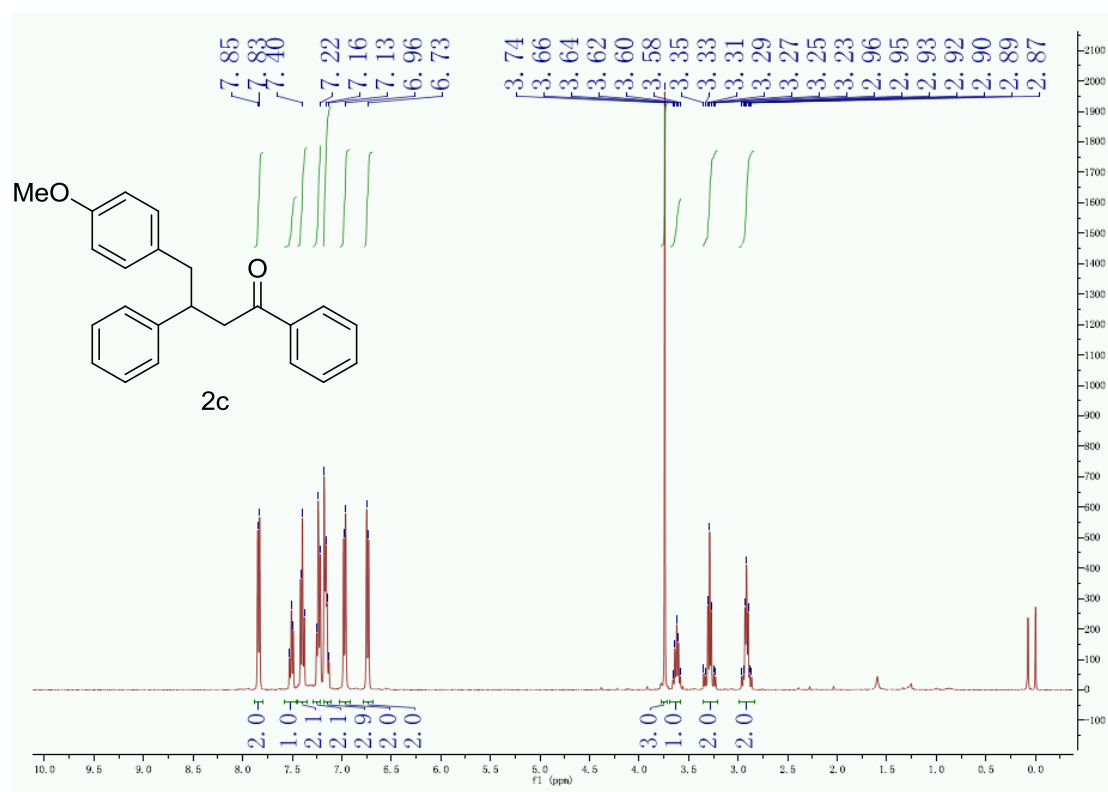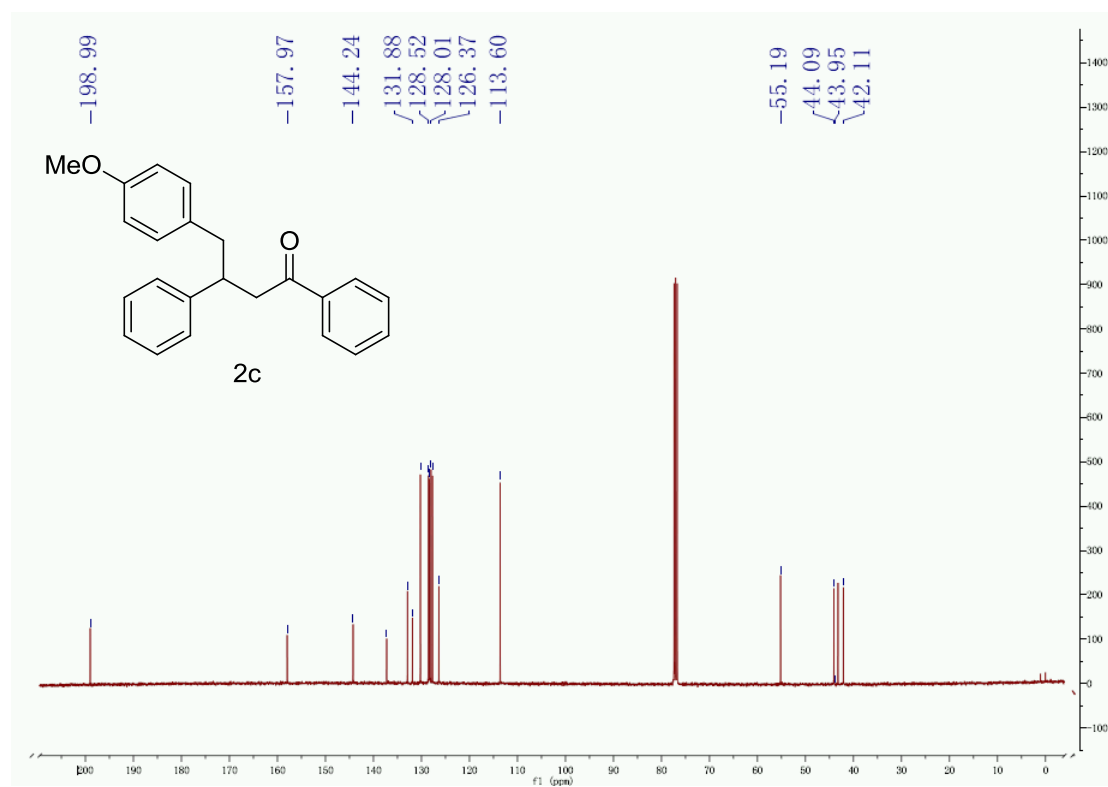

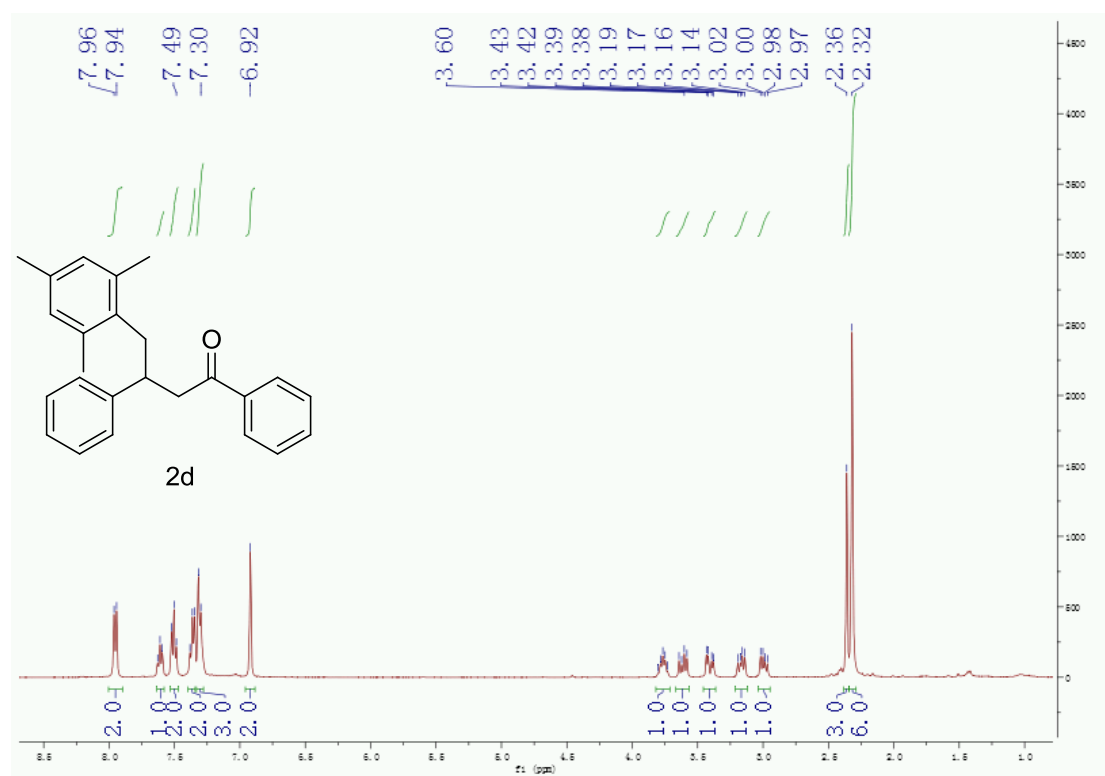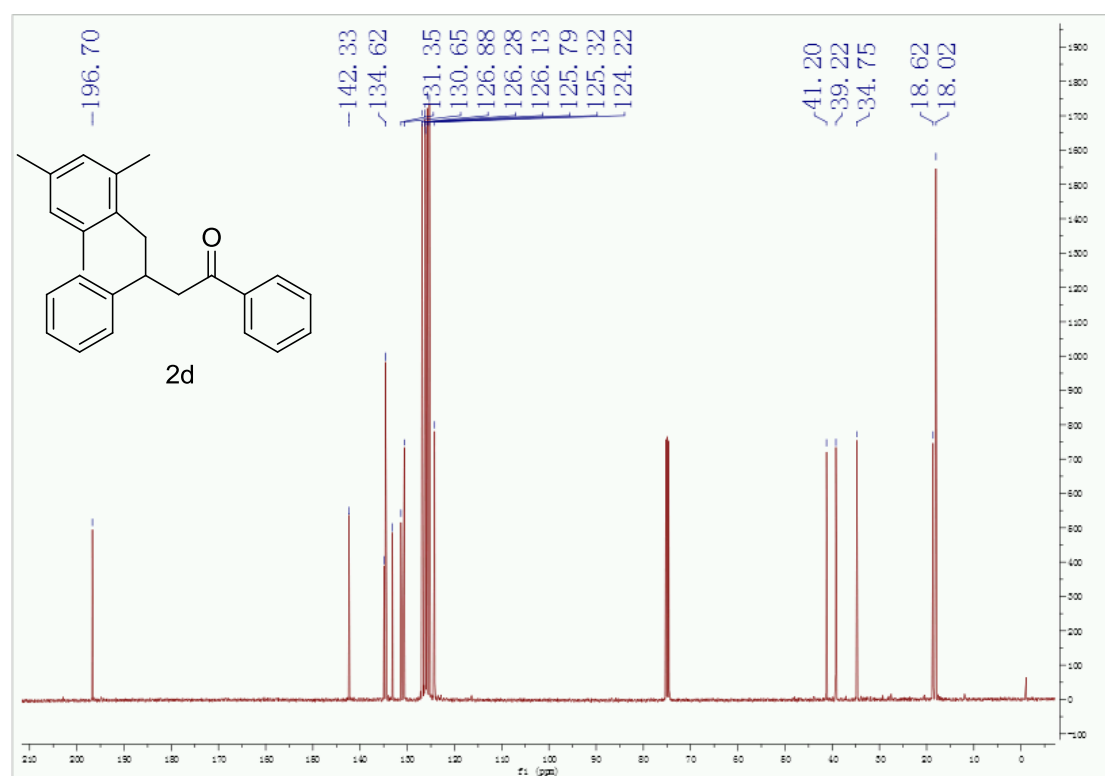

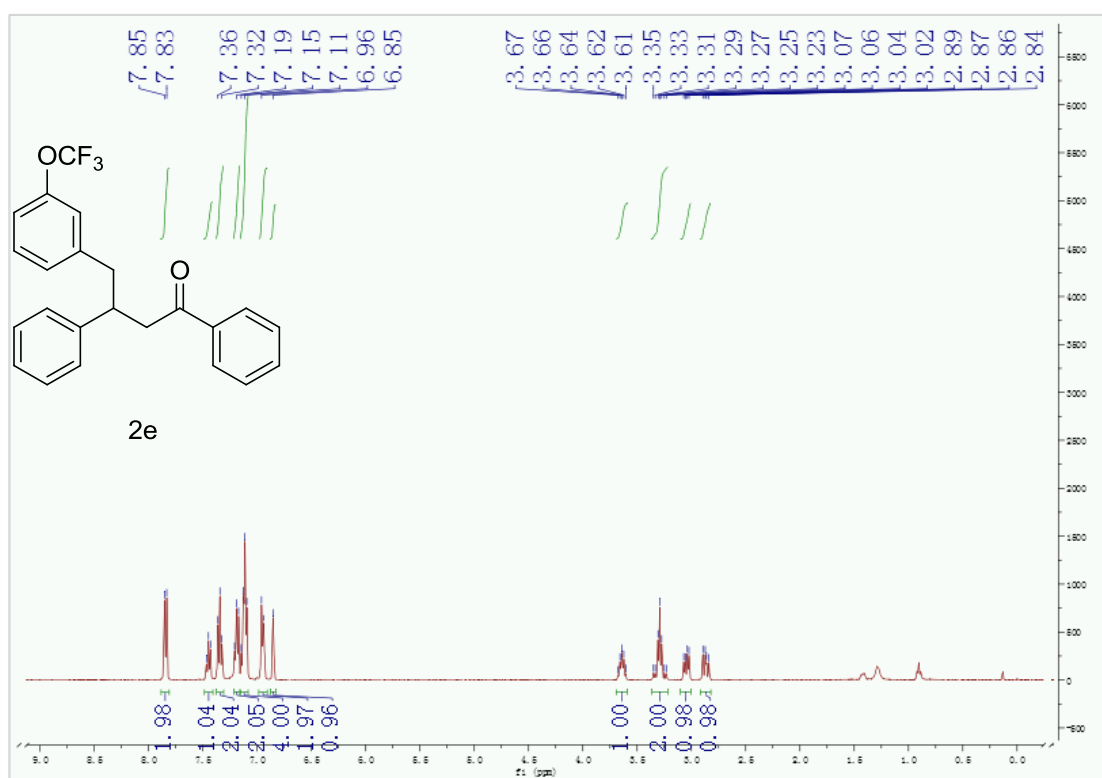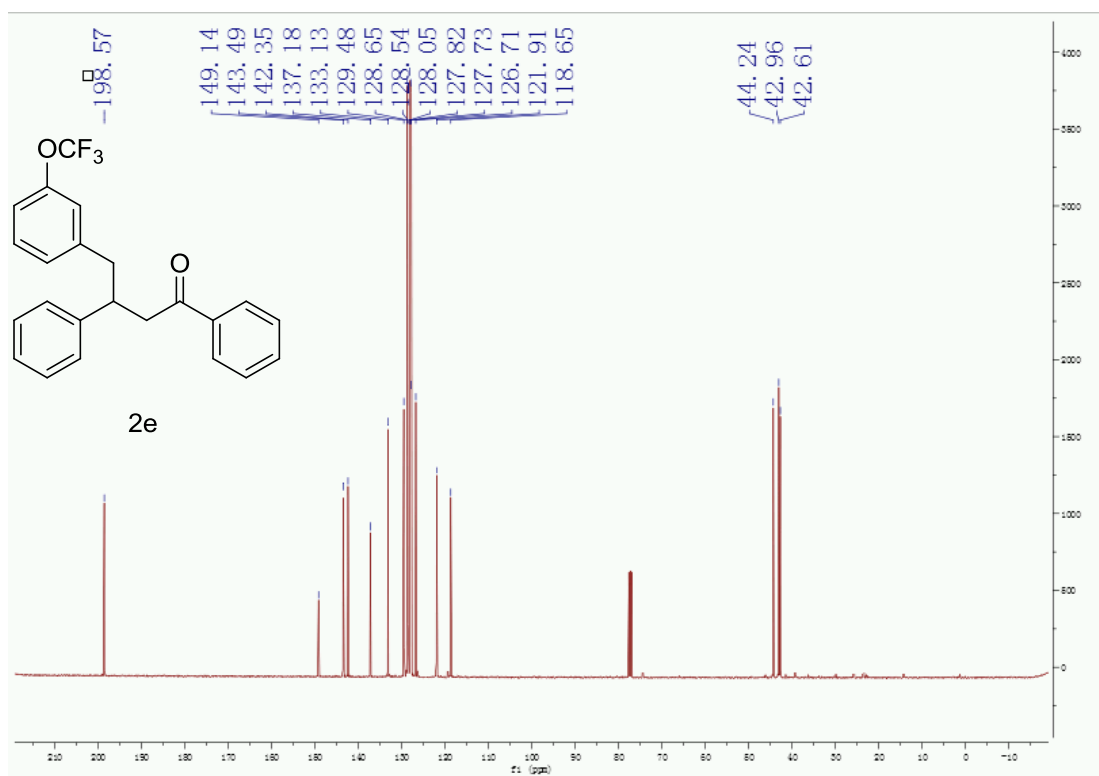

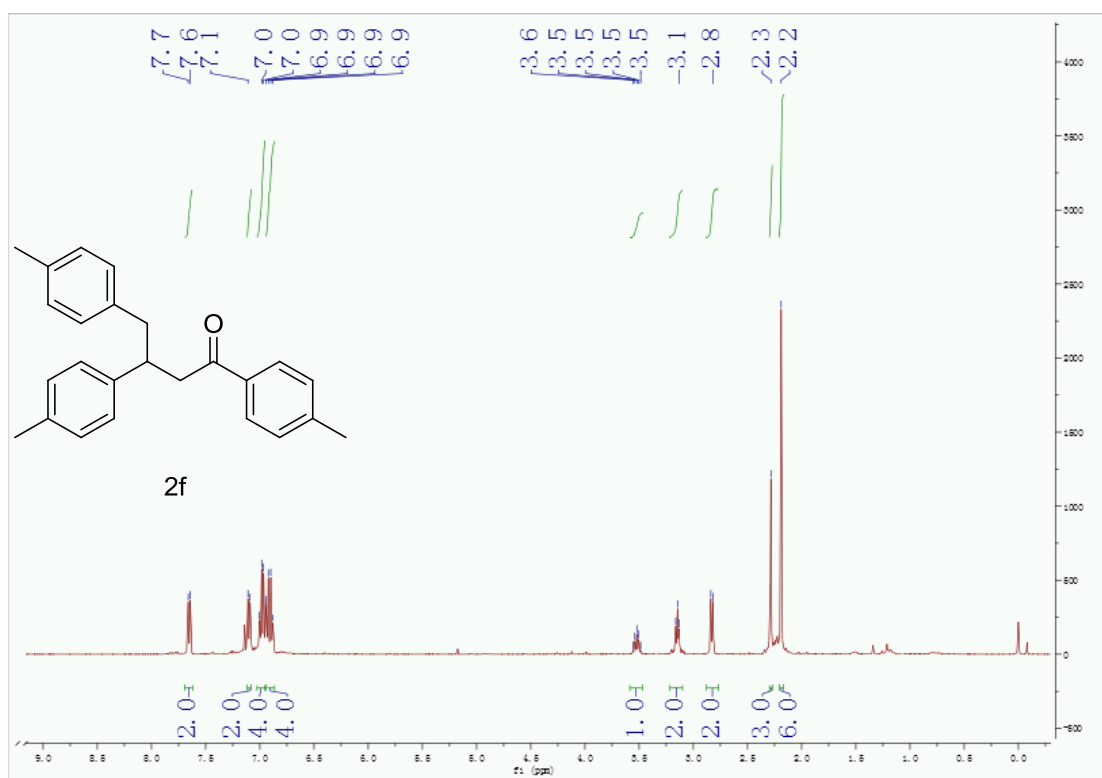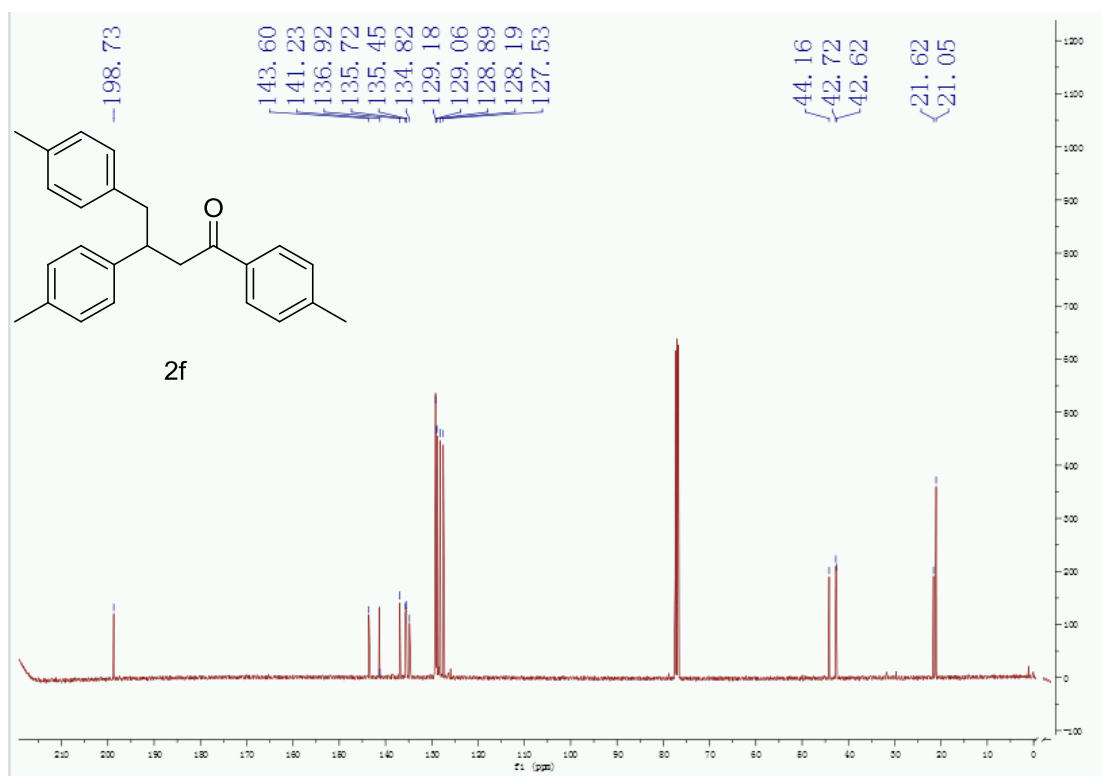

## 2. $^1\text{H}/^{13}\text{C}$ -NMR of the products **1** and representative substrates

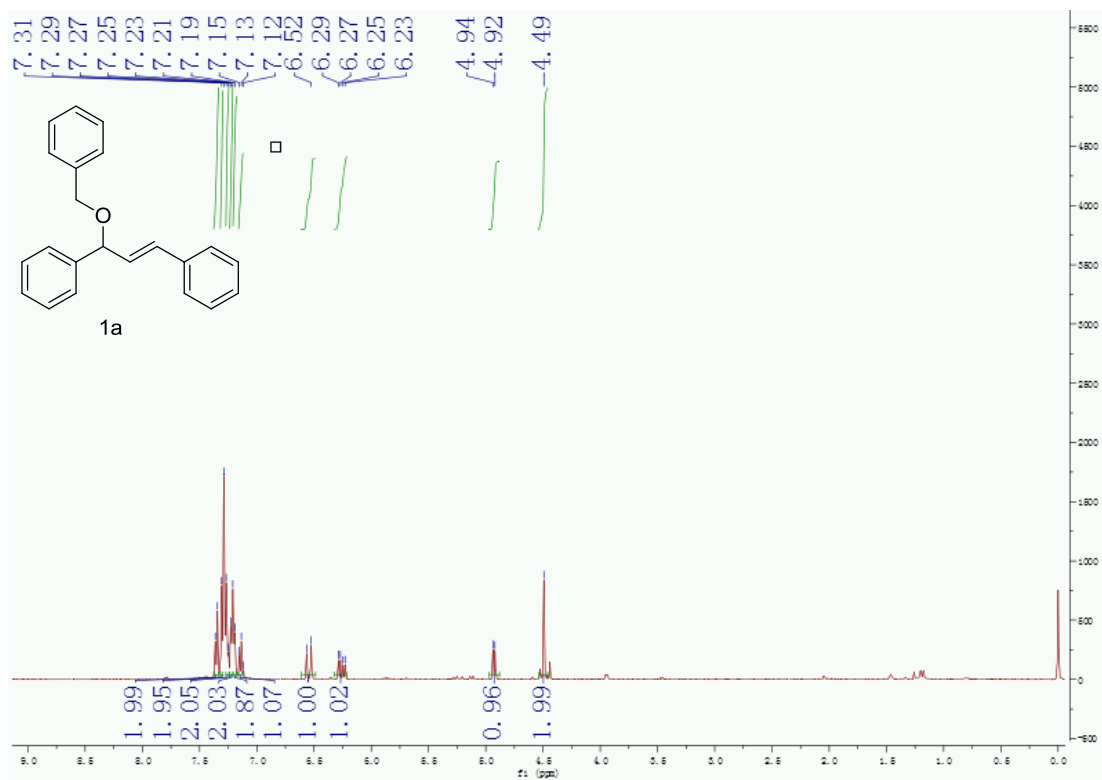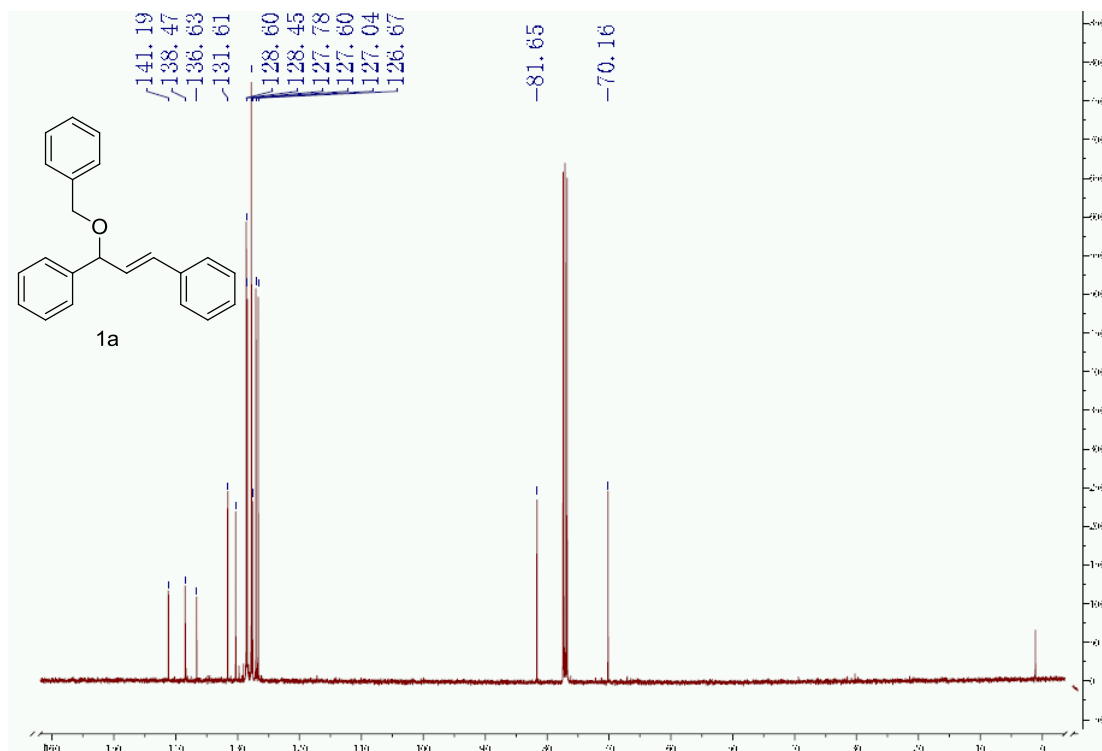

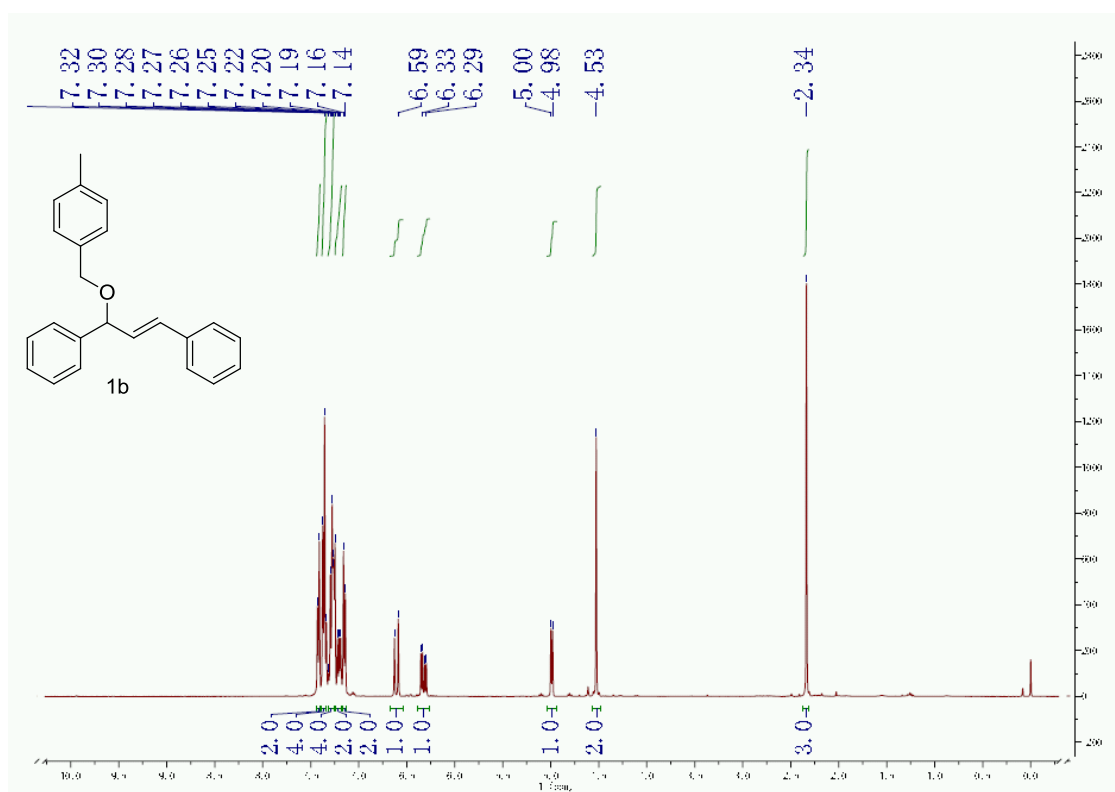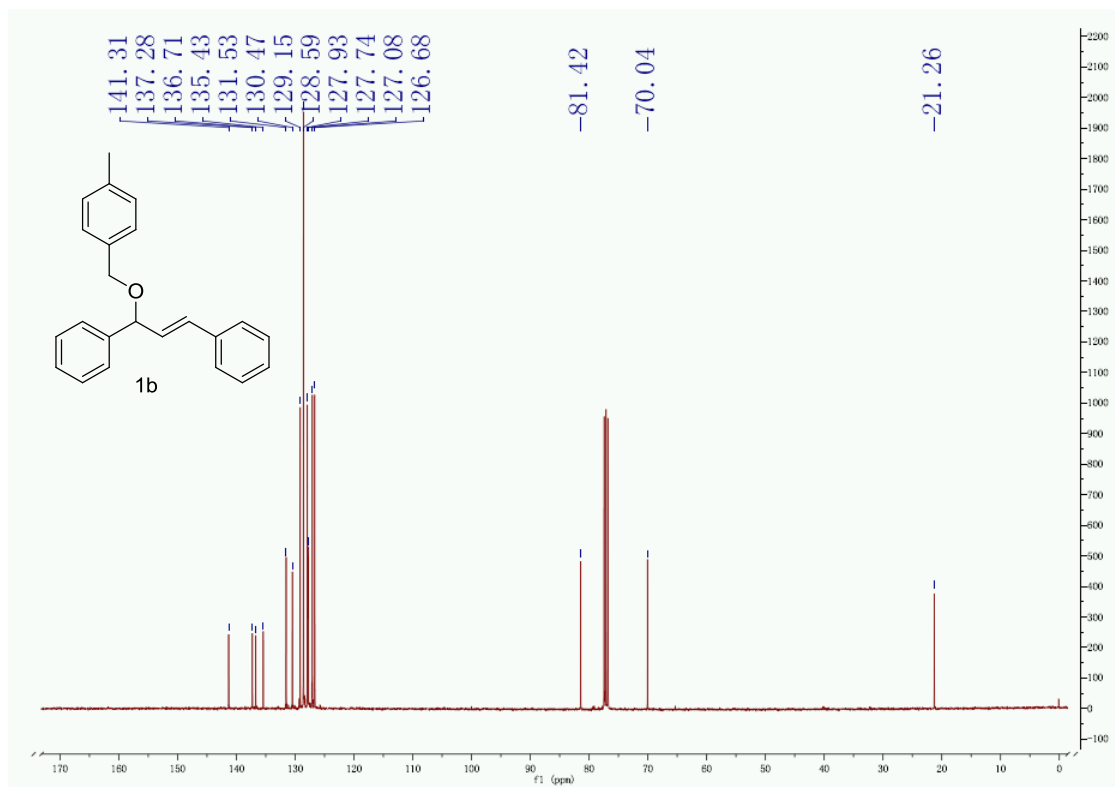

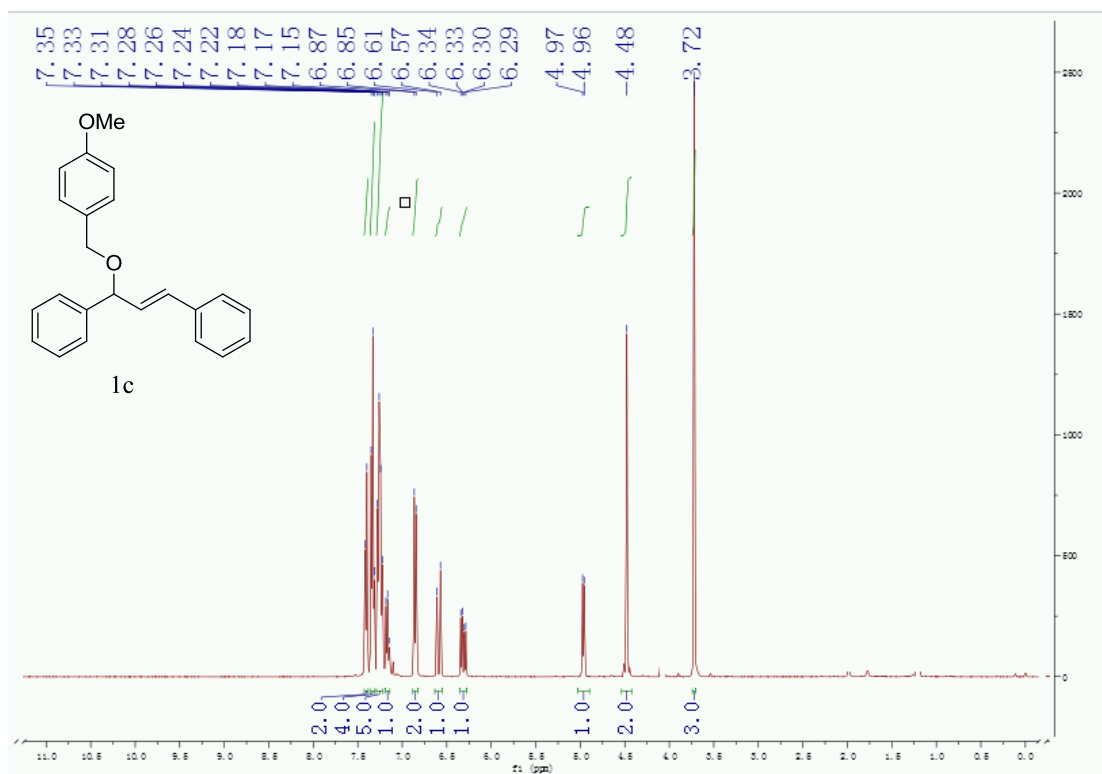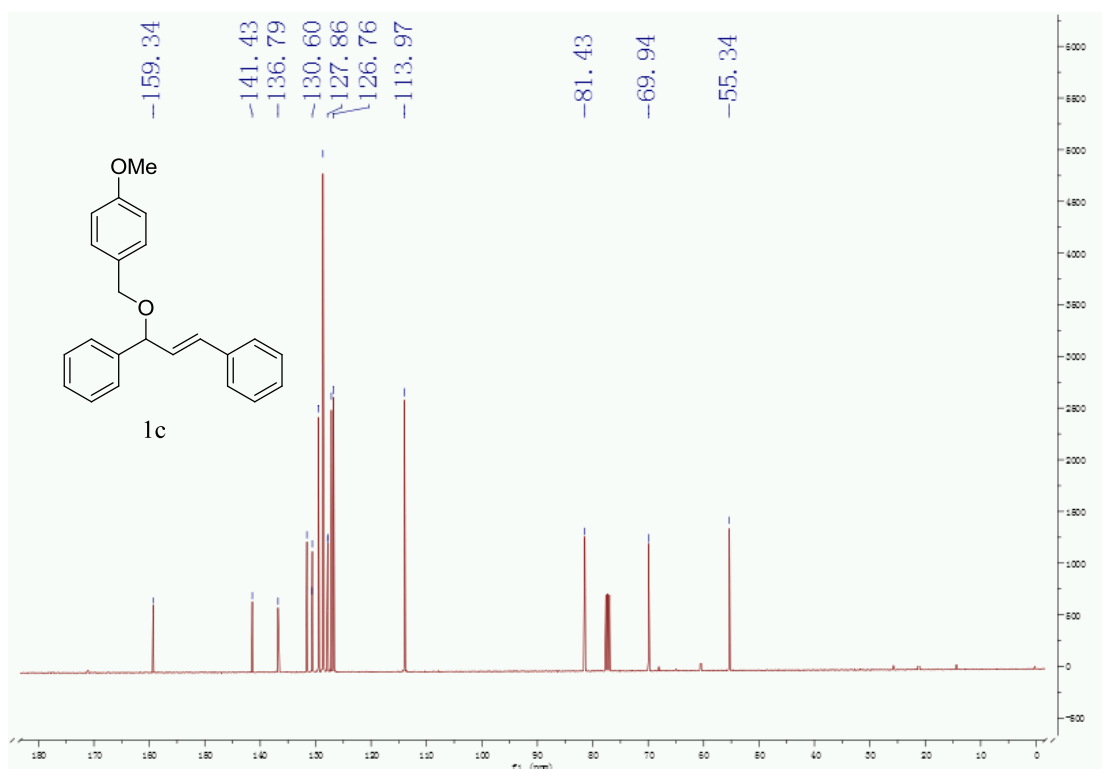

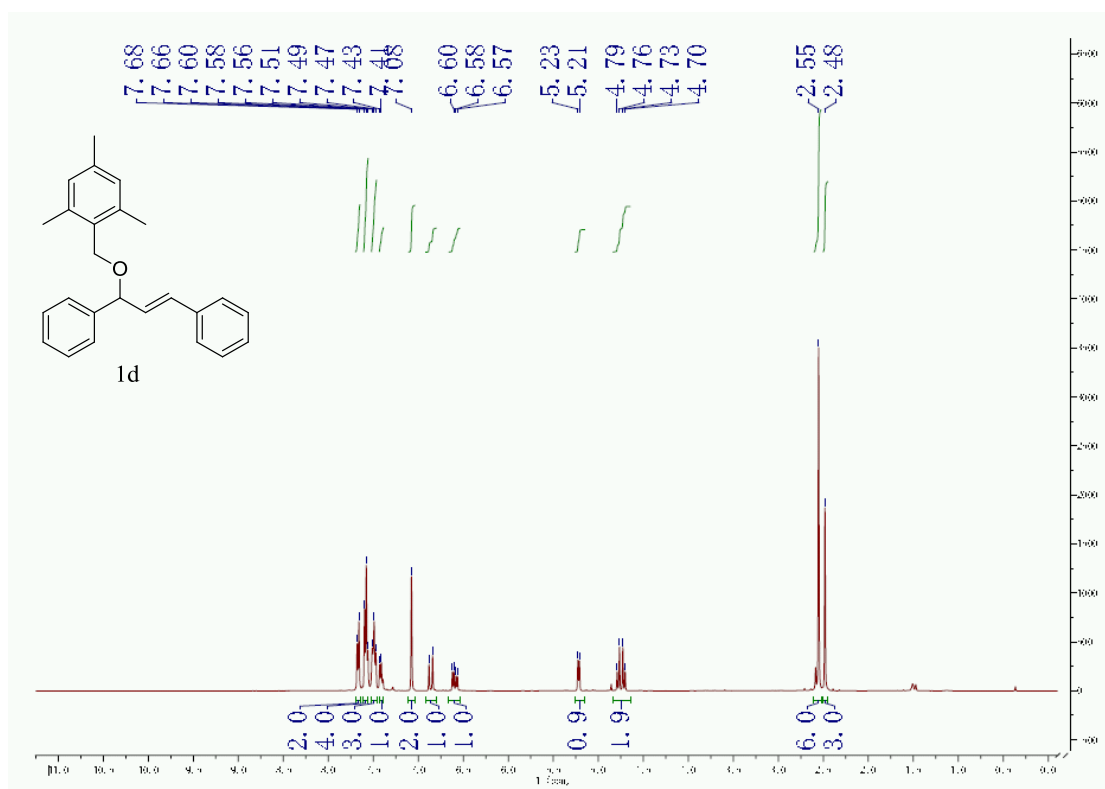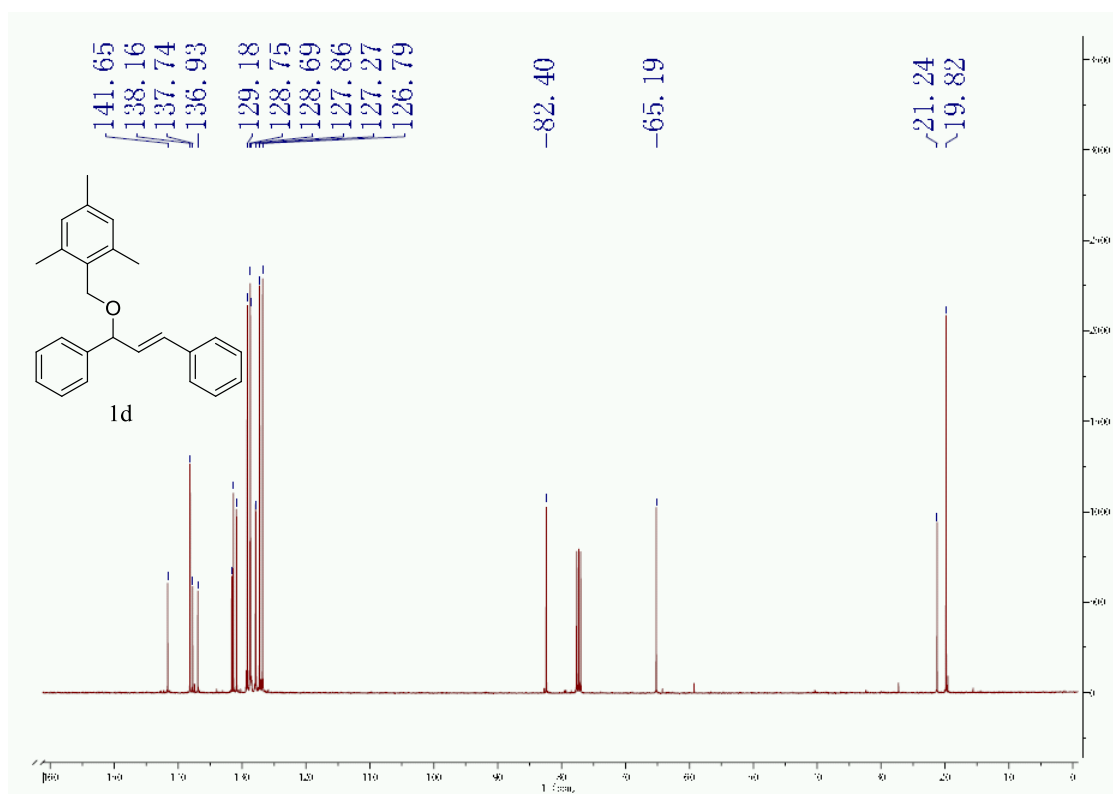

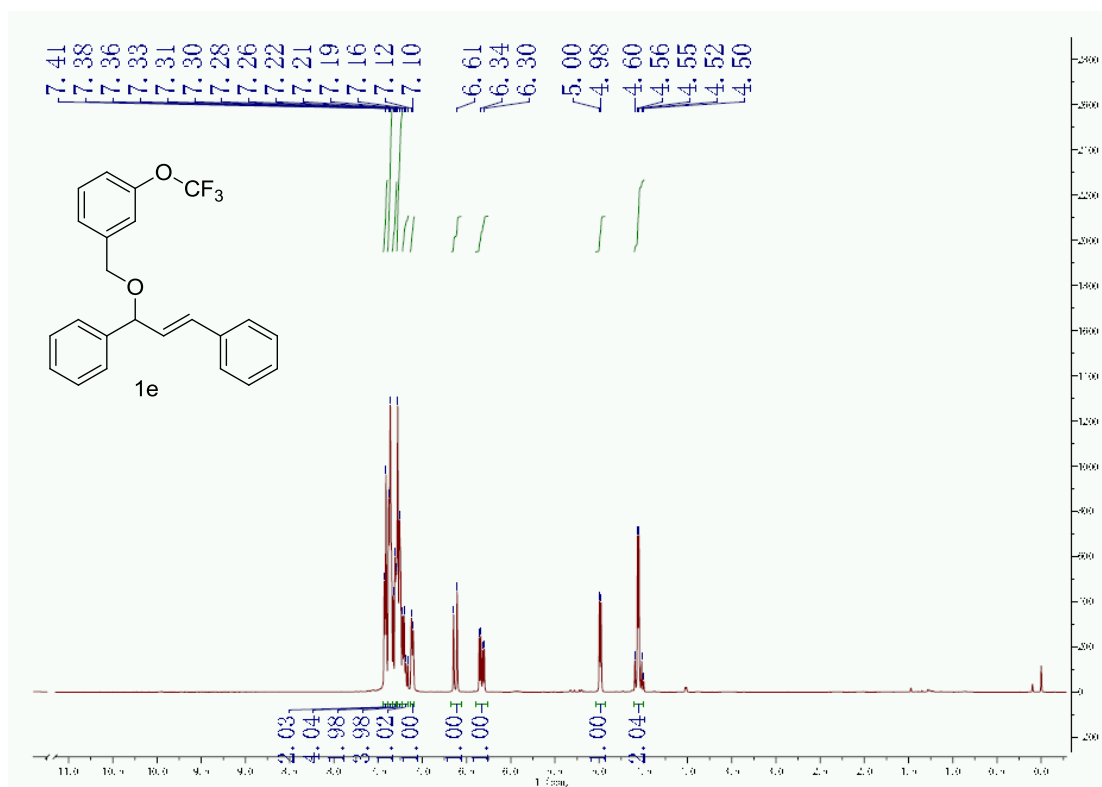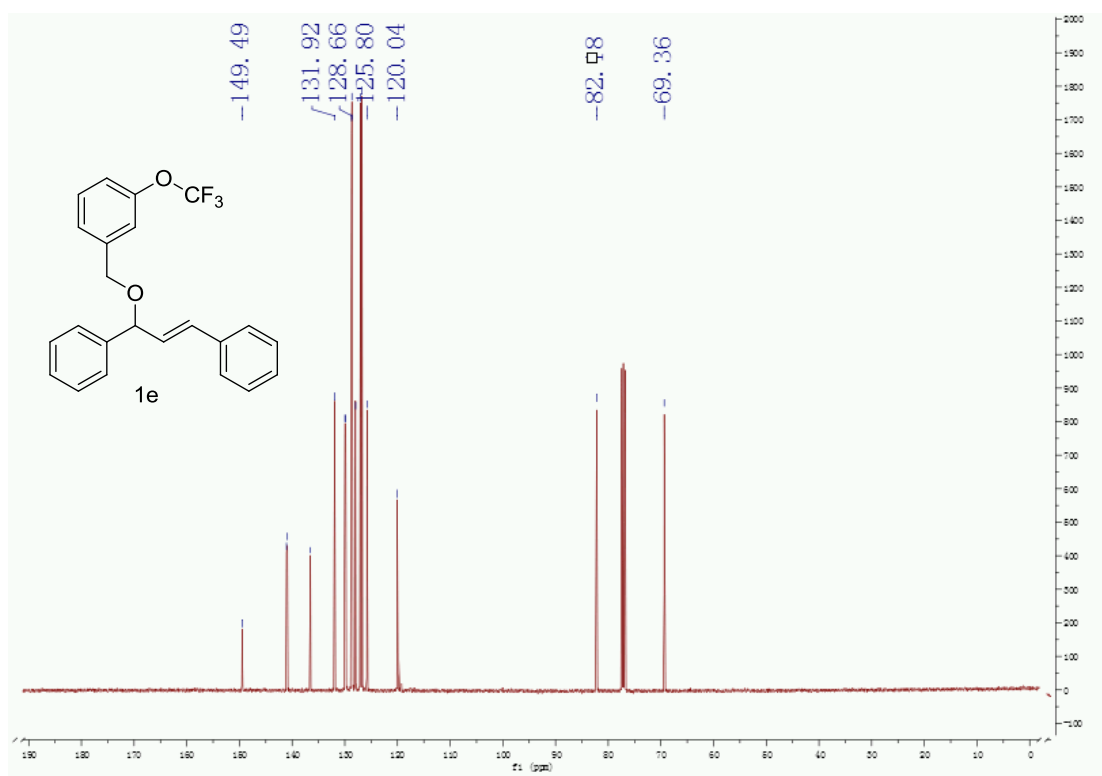

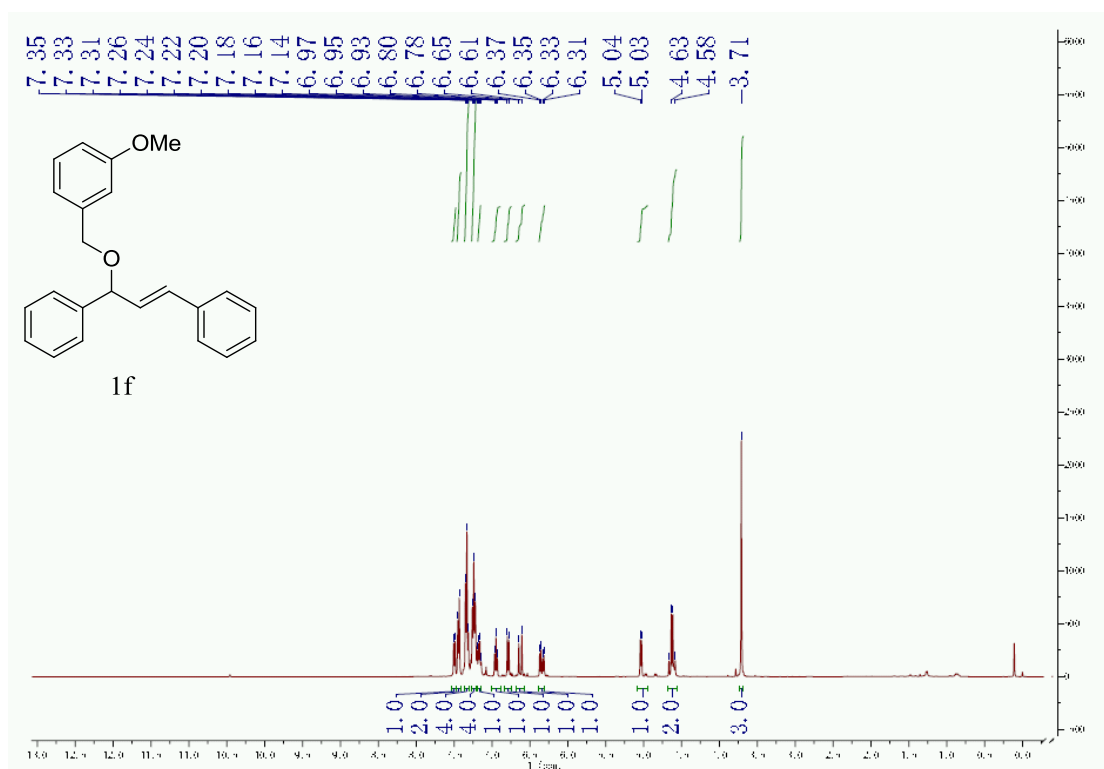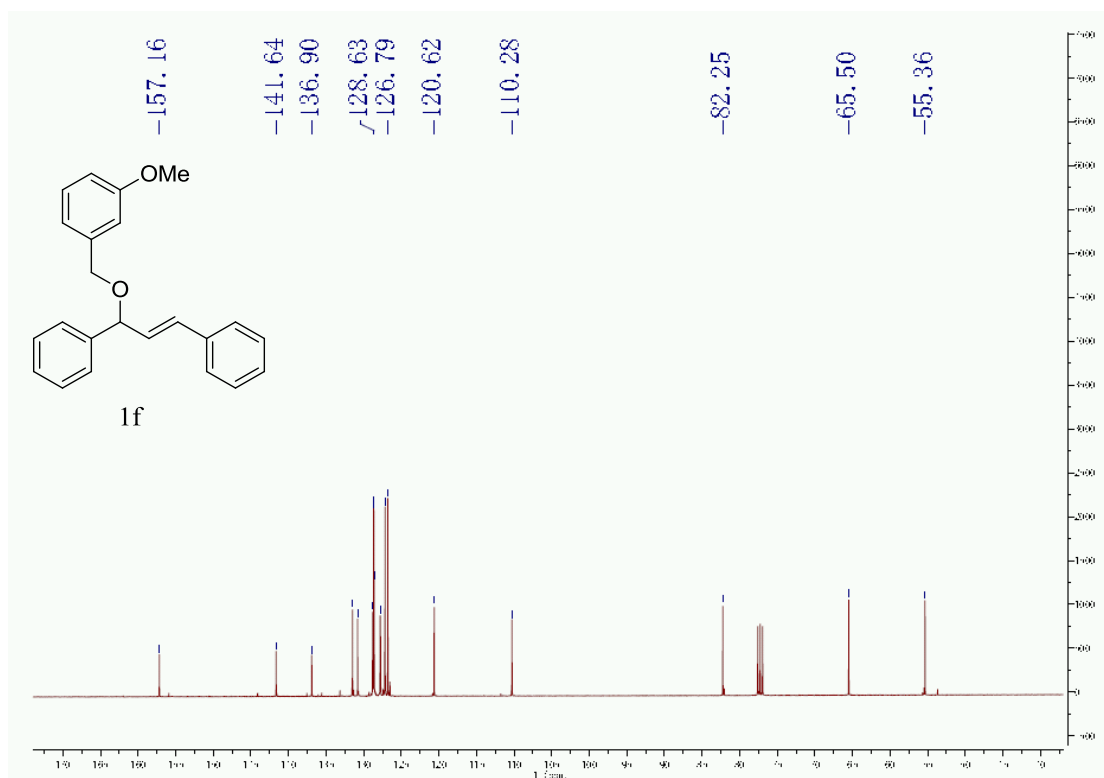

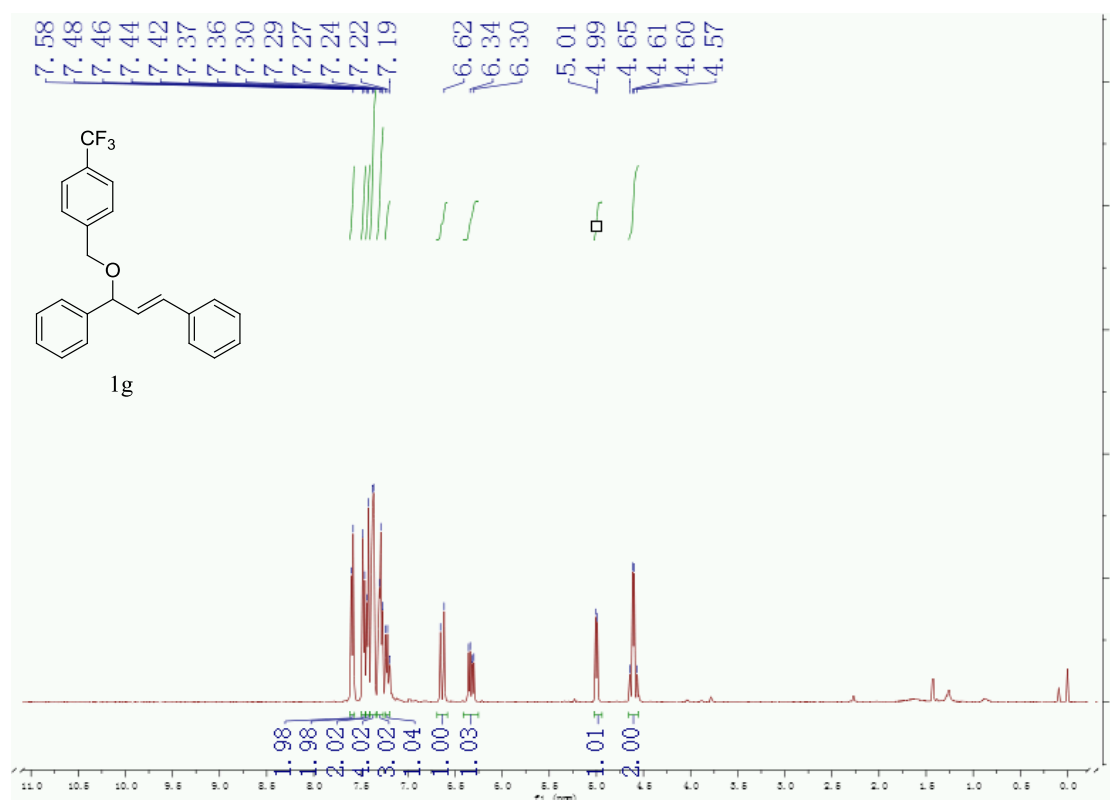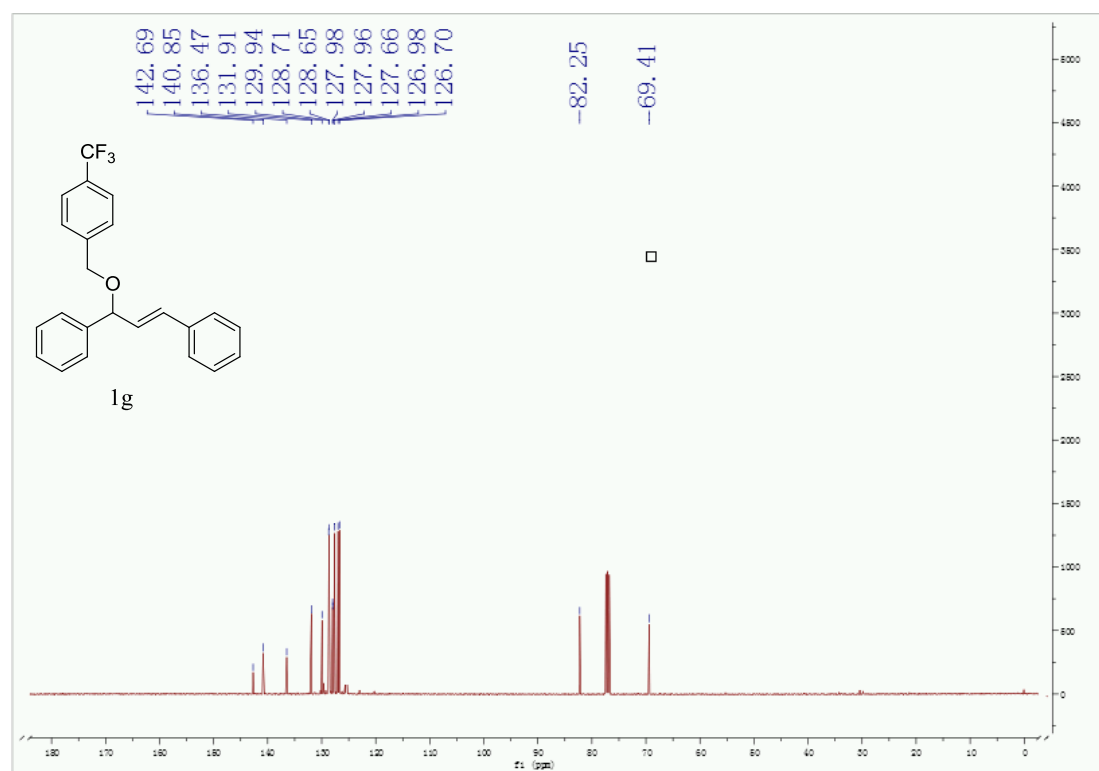

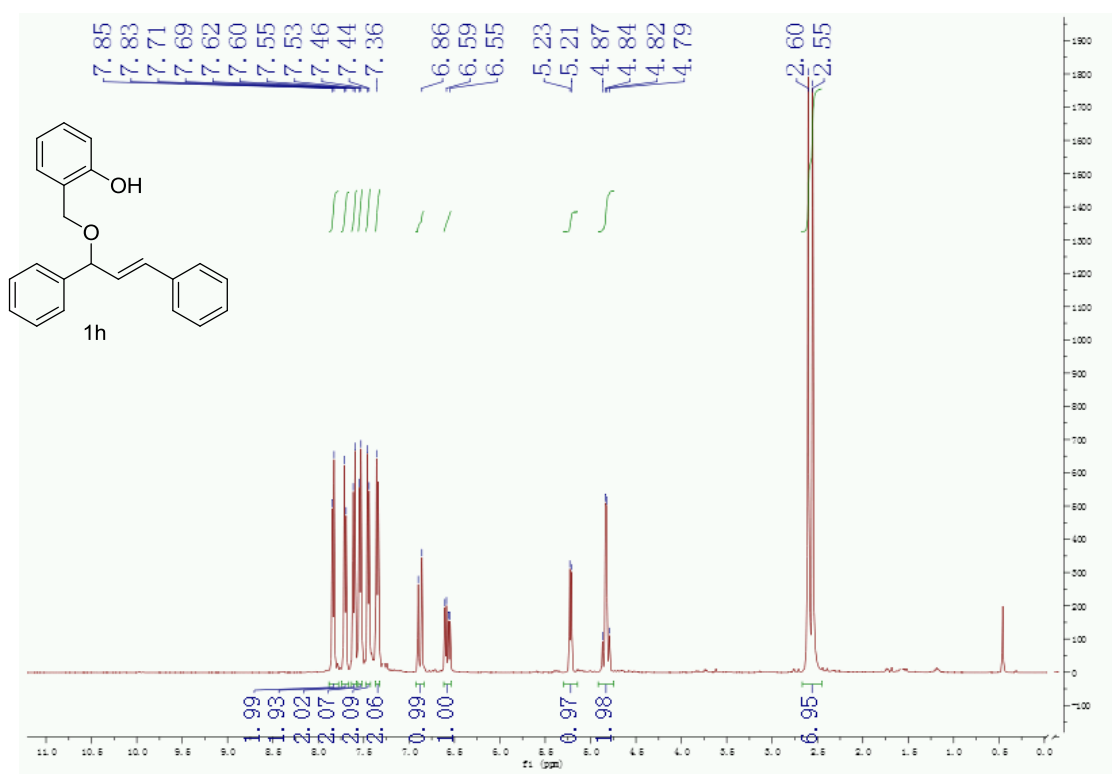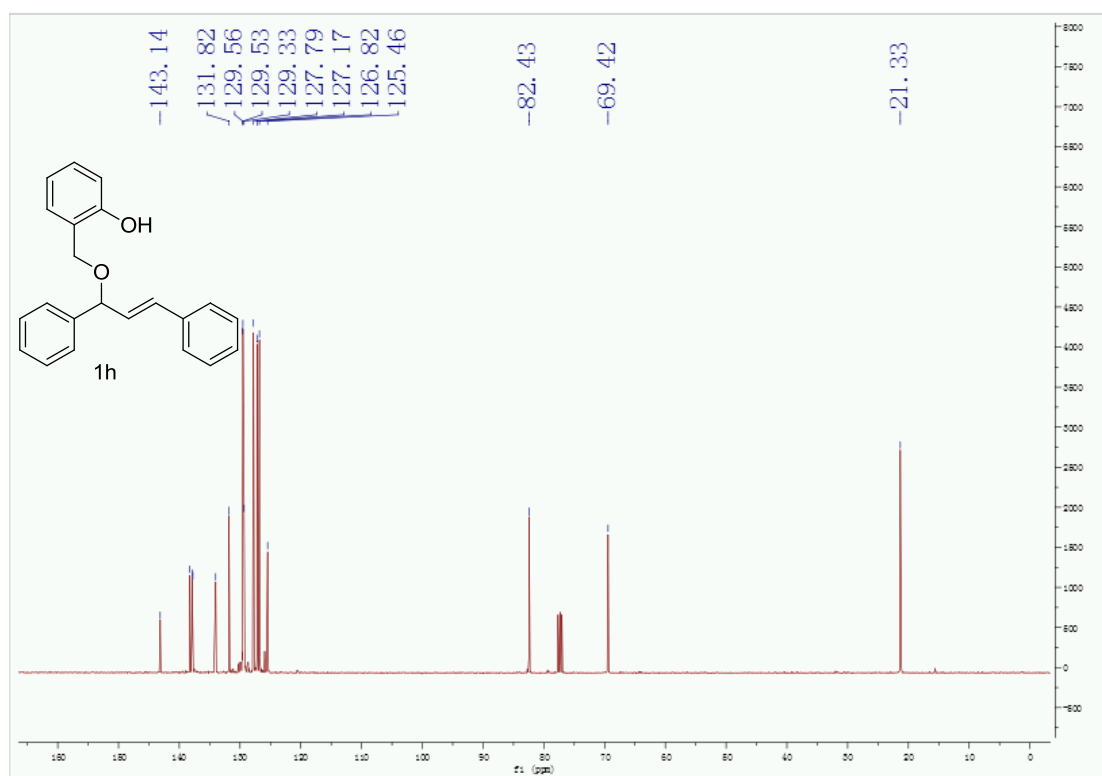

## 9. HR-MS of Representative products: 2b and 2c

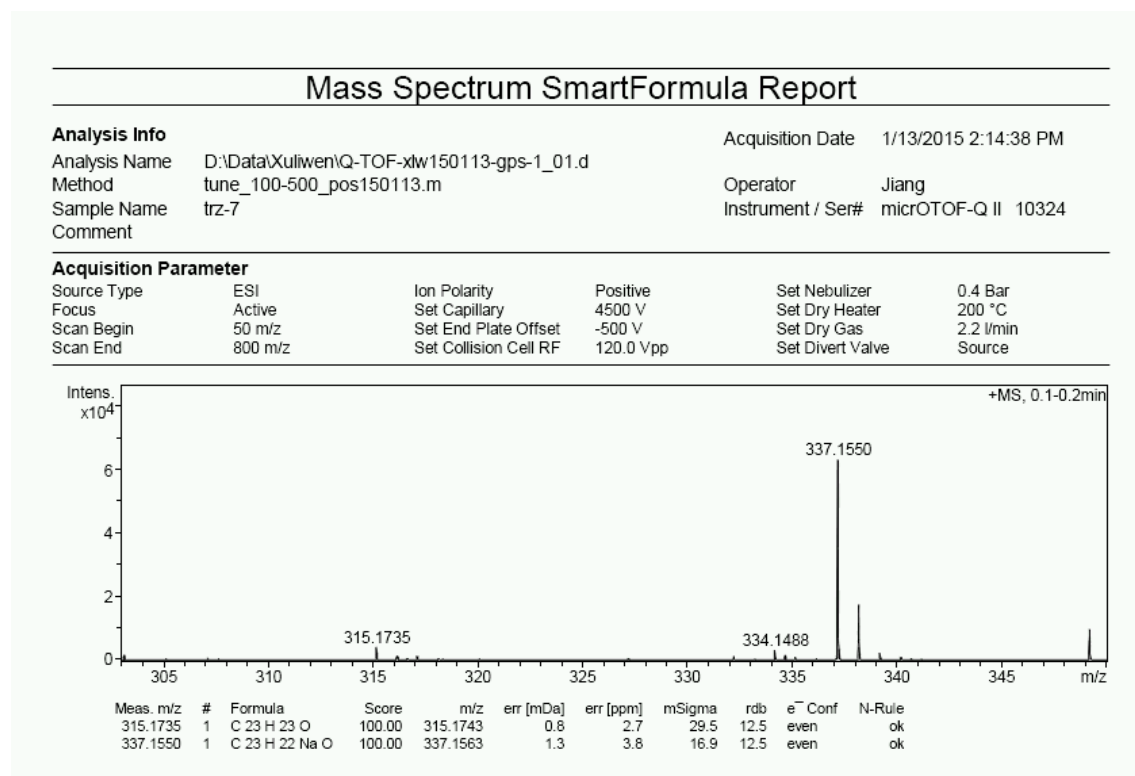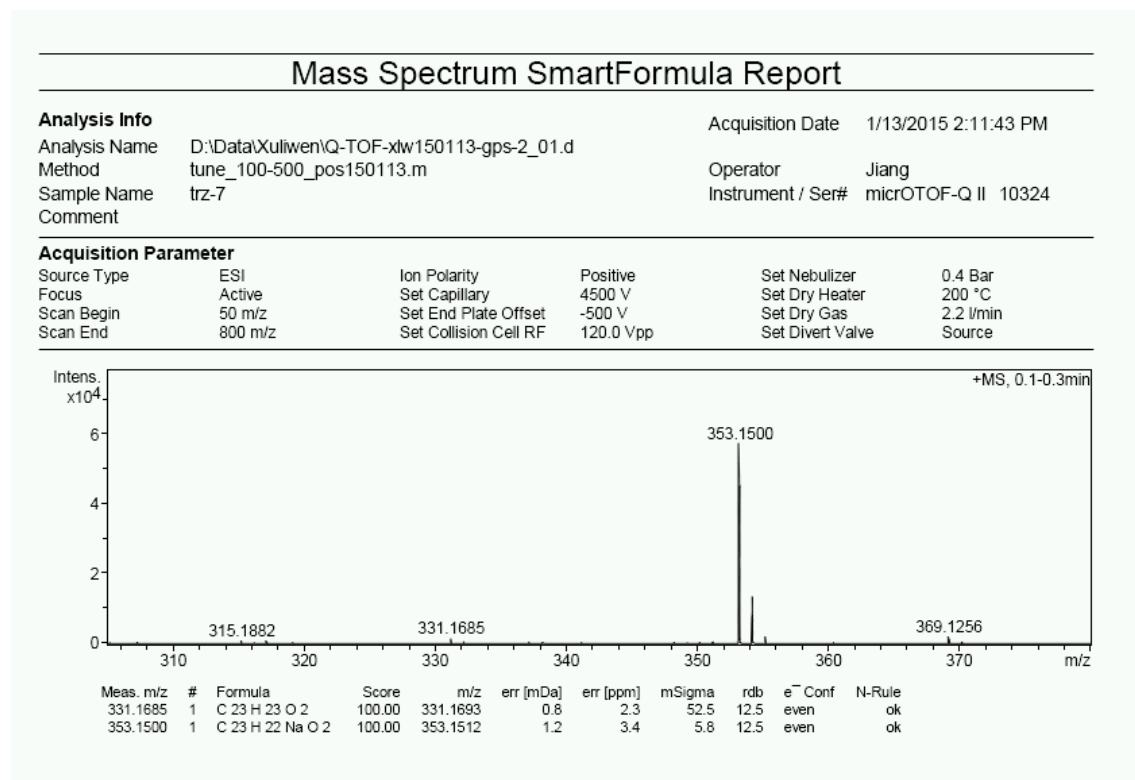

## 10 HPLC Charts of enantioselective [1,4]-Wittig rearrangement

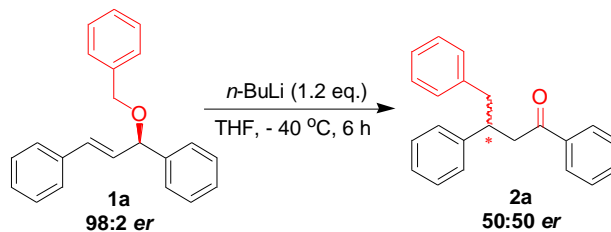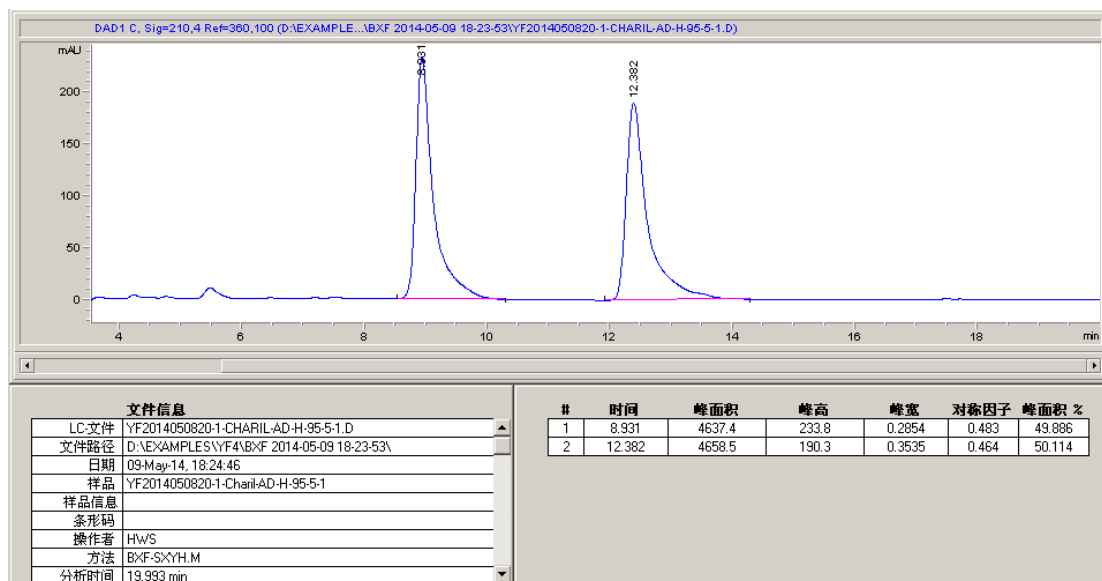

HPLC conditions: chiralcel AD-H, *n*-hexane/2-propanol = 95/5, 1.0 mL/min
